1       **Identification of microRNA-target interactions for antioxidant defense response under**  
2       **drought stress by high-throughput sequencing in *Zanthoxylum bungeanum* Maxim.**

3                   Xitong Fei<sup>1,2</sup>, Haichao Hu<sup>1,2</sup>, Jingmiao Li<sup>1,2</sup>, Yulin Liu<sup>1,2</sup>, Anzhi Wei<sup>1,2\*</sup>

4  
5       Xitong Fei<sup>1,2</sup>, Haichao Hu<sup>1,2</sup>, Jingmiao Li<sup>1,2</sup>, Yulin Liu<sup>1,2</sup>, Anzhi Wei<sup>1,2\*</sup>

6  
7       <sup>1</sup> College of Forestry, Northwest A&F University, Yangling, Shaanxi, China;

8       <sup>2</sup> Research Centre for Engineering and Technology of *Zanthoxylum* State Forestry  
9       Administration, Yangling, Xianyang 712100, China;

10       \* Correspondence: weianzhi@nwafu.edu.cn; Tel.: +86-29-8708-2211

11  
12       **ABSTRACT**

13       When the plant is in an unfavorable environment such as drought or high temperature, it will  
14       accumulate a large amount of active oxygen, which will seriously affect the normal growth and  
15       development of the plant. The antioxidant system can remove the reactive oxygen species  
16       produced under drought conditions and so mitigate oxidative damage. We examined the trends of  
17       antioxidant enzymes, miRNAs and their target genes in *Zanthoxylum bungeanum* under drought  
18       stress. According to the changes of antioxidant enzymes, miRNAs and their target genes  
19       expression patterns of *Zanthoxylum bungeanum* under drought stress, an interaction model was  
20       constructed to provide a reference for further understanding of plant antioxidant mechanism. The  
21       results indicate that under drought stress, POD, CAT, APX, proline, MDA and related genes all  
22       show positive responses to drought, while SOD and its genes showed a negative response. It is

23 speculated that in the antioxidant process of *Zanthoxylum bungeanum*, POD, CAT, and APX  
24 play a major role, and SOD plays a supporting role. In addition, the expression levels of miRNAs  
25 and their target genes were basically negatively correlated, indicating that miRNAs are involved  
26 in the regulation of the antioxidant system of *Zanthoxylum bungeanum*.

27 **Keywords:** antioxidant system; *Zanthoxylum bungeanum* Maxim.; reactive oxygen species;  
28 drought stress; miRNA-Target gene

29

## 30 INTRODUCTION

31 *Zanthoxylum bungeanum* Maxim. (common name Chinese prickly ash, family *Rutaceae*) is  
32 widely distributed in Asia (Yang et al., 2013) where it is an important economic crop. Evolution  
33 and natural selection have led the epidermis of *Z. bungeanum* to bear prickles. This species also  
34 has strong drought adaptability. The skin of *Z. bungeanum* is the source of one of the eight  
35 traditional Chinese condiments, so this plant plays a very important role in Chinese food culture.  
36 Because of its unique numbing taste, *Z. bungeanum* is difficult to replace with other seasonings  
37 (Zhang et al., 2014). It has become an important component of the diet in various parts of Asia,  
38 especially in China. *Zanthoxylum bungeanum* and pepper become best companions and are  
39 together an important part of the ‘hot pot’ culture. In addition to its use as a food seasoning, the  
40 skin of *Z. bungeanum* also contains chemical components showing proven medicinal properties,  
41 including bactericidal (Zhang et al., 2016b), insecticidal (Zhang et al., 2016a), antioxidant  
42 (Zhang et al., 2014) and topical anesthetic (Rong et al., 2016).

43 Drought stress can cause a series of physiological and molecular reactions in plants, which  
44 seriously affect normal growth. Thus, drought can cause imbalances in cellular reactive oxygen

45 species (ROS), it can also upset cell membrane lipid peroxidation and it can damage cell and  
46 organelle membranes. Excessive ROS have toxic effects on plants. Irrigated agriculture is not yet  
47 general, so drought remains one of the most important unfavorable factors affecting both the  
48 yield and quality of most commercial crops. Plants have many protective responses to maintain  
49 metabolic stability and so continue life under environmental stress. Their antioxidant systems are  
50 able to produce a variety of antioxidant enzymes - including superoxide dismutase, peroxidase,  
51 antioxidant enzymes, ascorbate peroxidase - to combat the ROS produced under drought stress  
52 (Gill & Tuteja, 2010, N. & K., 1977). For example, catalase can decompose H<sub>2</sub>O<sub>2</sub> produced in  
53 plants to form water and oxygen, reducing or eliminating damage by this ROS (Chance. &  
54 Maehly., 1955). The antioxidant system also maintains organelle stability, preventing damage to  
55 the chloroplast membrane and so stabilizing the PSII system (Lima et al., 2018). In addition,  
56 stomata are important gas exchange organs of plants, playing irreplaceable roles in the regulation  
57 of photosynthesis, respiration, transpiration and temperature (Li et al., 2017, Martin-StPaul et al.,  
58 2017). The stomata are also the water-regulating organs of plants. Under drought, water  
59 conservation becomes the decisive factor for plant survival. The response of stomata to drought  
60 is also a way for plants to protect themselves. Under drought stress, plants reduce water loss by  
61 stomatal closure and so increase their ability to resist drought (García-Mata. & Lamattina.,  
62 2001, Cornic., 2000).

63 The impact of drought on the yield and quality of *Z. bungeanum* is huge and seriously  
64 hinders the development of this industry. miRNAs and their target genes for antioxidant defense  
65 response under drought stress remain unclear. Hence a study of their behavior under drought  
66 stress, will have significance for better understating this species' drought-resistance mechanisms.  
67 It can also provide a basis for drought-resistant breeding of *Z. bungeanum* and of related species.

## 68 MATERIALS AND METHODS

### 69 Materials

70 The *Z. bungeanum* seeds were collected from the Fengxian Chinese prickly ash Experimental  
71 Station of Northwest Agriculture and Forestry University. They were germinated and cultured in  
72 an artificial climate chamber at  $25\pm 2^{\circ}\text{C}$ . Air humidity was set to 80% and the photoperiod to 16:8  
73 h (light:dark). Three-month-old seedlings were used as experimental material. *Zanthoxylum*  
74 *bungeanum* seedlings were then cultured in half-strength Murashige and Skoog (MS) liquid  
75 medium containing 20% PEG6000. Leaf samples were collected and stored in liquid nitrogen  
76 after periods of 0, 3, 6, 12, 24, 36 and 48 h.

### 77 Methods

#### 78 Physiological index determination

79 The leaf samples after different periods of drought stress were used to determine antioxidant  
80 enzyme activity and malondialdehyde (MDA) and proline contents. Superoxide dismutase  
81 (SOD) activity was determined by the nitroblue tetrazolium method (N. & K., 1977). Peroxidase  
82 (POD) activity was determined by the guaiacol method and catalase (CAT) activity was  
83 determined by the hydrogen peroxide ultraviolet method (Chance. & Maehly., 1955). For APX  
84 (L-ascorbate peroxidase) activity we used the method of Panchuk et al (Panchuk et al., 2002).  
85 The MDA content was determined by the thiobarbituric acid (TBA) method (Fu. & Huang.,  
86 2001). Proline was determined by ninhydrin colorimetry (Bates et al., 1973).

87 **Total RNA extraction**

88 Total RNA of the *Z. bungeanum* samples was extracted using the TaKaRa MiniBEST Plant RNA  
89 Extraction Kit (TaKaRa, Beijing, China) following the manufacturer's instructions. The purity  
90 and concentration of the RNA obtained were measured using NanoDrop 20000 (Thermo  
91 Scientific, Pittsburgh, PA, USA). Only samples where the OD260/280 value was 1.8-2.0 and the  
92 OD260/230 value was higher than 2.0 were used for cDNA synthesis.

93 **Quantitative Real-time PCR**

94 Primer 7.0 software (Premier, Palo Alto, CA, USA) was used to design RT-qPCT primers (see  
95 Table 1). The qRT-PCR assays were carried out on a CFX96 Real-Time PCR Detection System  
96 (Bio-Rad, Hercules, CA, USA). The reaction system was of 10  $\mu$ l, containing 5  $\mu$ l of 2 $\times$  SYBR  
97 Premix Ex Taq II (TaKaRa), 1  $\mu$ l of cDNA, 1  $\mu$ l of each of the upstream and downstream  
98 primers and 2  $\mu$ l of ddH<sub>2</sub>O. *ZbUBQ* and *Zb $\alpha$ -EF* were used for the reference genes to correct the  
99 RT-qPCR data (Fei et al., 2018). The RT-qPCT reaction system of miRNAs is identical to  
100 mRNA, with a reaction system of 10  $\mu$ L, containing 5  $\mu$ L of 2 $\times$  SYBR Premix Ex Taq II  
101 (TaKaRa, Beijing, China), 1  $\mu$ L of cDNA, 1  $\mu$ L of each of the forward and universal reverse  
102 primer and 2  $\mu$ L of ddH<sub>2</sub>O. U6 was used for the correction of relative expression levels of  
103 miRNAs (Zhang et al., 2018).

104 **Table 1.** RT-qPCR primers.

| Name        | Description                                   | Forward primer sequence (5'-3') | Reverse primer sequence (5'-3') |
|-------------|-----------------------------------------------|---------------------------------|---------------------------------|
| <i>SOD1</i> | Superoxide dismutase [Mn] 1,<br>mitochondrial | CAGCGTCTCACATCATTTCATTT         | TCTTCAGTCCACGTAGCCCTAGT         |

---

|              |                                                                                                                                                                                                                                                            |                             |                             |
|--------------|------------------------------------------------------------------------------------------------------------------------------------------------------------------------------------------------------------------------------------------------------------|-----------------------------|-----------------------------|
| <i>SOD2</i>  | Superoxide dismutase [Fe],<br>chloroplastic-like isoform X2                                                                                                                                                                                                | GGGATTACTCACCTCTCCTTACC     | TCCTCTTCTCTTTTCCTCCTTTC     |
| <i>PRX2E</i> | Peroxiredoxin-2E, chloroplastic (POD)                                                                                                                                                                                                                      | AATCAAAAGGCATCGACACCA       | ACTCCCCATTCCCATCAGACA       |
| <i>CAT</i>   | Catalase isozyme 1 (CAT)                                                                                                                                                                                                                                   | TTTCCCTGTCTTCTTCATCCGT      | TCCTTCCATGTGCCTGTAATCT      |
| <i>APX3</i>  | L-ascorbate peroxidase 3                                                                                                                                                                                                                                   | GCCTTCCAGATGCCAAACAA        | CCCCCTGAGAGTGCCACTAT        |
| <i>GPXI</i>  | Phospholipid hydroperoxide<br>glutathione peroxidase 1,<br>chloroplastic (GPX1)                                                                                                                                                                            | CAAGTGCTGGGGGATTTTTA        | ATGGTGATGTTGTTGGTGGA        |
| <i>P5CS</i>  | Delta-1-pyrroline-5-carboxylate<br>synthase.<br>Key enzyme for the synthesis of<br>proline                                                                                                                                                                 | AGCAAAACACCAAGCAGAAATA<br>A | AATAACAGGGATACCAGCATAA<br>G |
| <i>JARI</i>  | Jasmonic acid-amido synthetase<br>JAR1, participate in the synthesis<br>of jasmonic acid                                                                                                                                                                   | CTCGGAAGCAGCAGCCAAACT       | AGCAAAGGAGCAATCCAAACA       |
| <i>ABI</i>   | ABSCISIC ACID-INSENSITIVE<br>5-like protein 5. Key nodes and<br>inhibitors of the abscisic acid<br>(ABA) signaling pathway regulate<br>a variety of ABA responses, such<br>as stomatal closure, plasma<br>membrane permeability and water<br>permeability. | TGTCTCCAGTTCCTTACATGTTT     | CTTGCTGCTGACTCTCTATTCTT     |

---

|                |                                                                                                                                      |                          |                        |
|----------------|--------------------------------------------------------------------------------------------------------------------------------------|--------------------------|------------------------|
| <i>MAPK1</i>   | Mitogen-activated protein kinase 1                                                                                                   | CTAACTCTAACCCCTCCAGCCCAG | TTTCGTTCCACATCATTTCCTT |
| <i>PDI52</i>   | Protein disulfide-isomerase 5-2 isoform X1                                                                                           | AGAGAAGGAAGAACCGAAAA     | GAAGTGCCAACACTGAGAGG   |
| <i>RBOHC</i>   | Respiratory burst oxidase homolog protein C [Citrus sinensis]                                                                        | GGCACCCATTTTCAATAA       | GCTCTGAGGAGTCCACTT     |
| <i>NRX1</i>    | Probable nucleoredoxin 1                                                                                                             | TGAAGCCATCGAAGAACAC      | CCCCTAAAACCAAACAGA     |
| <i>TCTP</i>    | Translationally-controlled tumor protein homolog; Involved in the regulation of abscisic acid- and calcium-mediated stomatal closure | TCTCTCAGACTCGTTTCCCTAC   | CTCCTTGAACAACCCACTTTCC |
| <i>ZbUBQ</i>   | <i>Zanthoxylum bungeanum</i> ubiquitin extension protein, reference gene                                                             | TCGAAGATGGCCGTACATTG     | TCCTCTAAGCCTCAGCACCA   |
| <i>Zba-EF</i>  | <i>Zanthoxylum bungeanum</i> Elongation factor 1-alpha, reference gene                                                               | GTGCTTGACTGCCACACCTC     | TTCCGGCATCTCCATTCTTC   |
| ath-miR396a-5p | Target gene is SOD1                                                                                                                  | TTCCACAGCTTTCTTGAAGT     | –                      |
| ath-miR834     | Target gene is SOD2                                                                                                                  | TGGTAGCAGTAGCGGTGGTAA    | –                      |
| ath-miR167a-3p | Target gene is PRX2E                                                                                                                 | GATCATGTTTCGCAGTTTCACC   | –                      |
| ath-miR169b-3p | Target gene is CAT                                                                                                                   | GGCAAGTTGTCCTTCGGCTACA   | –                      |
| ath-miR447a-3p | Target gene is APX3                                                                                                                  | TTGGGGACGAGATGTTTTGTTG   | –                      |
| ath-miR773b-3p | Target gene is GPX1                                                                                                                  | TTTGATTCCAGCTTTTGTCTC    | –                      |
| ath-miR397b    | Target gene is P5CS                                                                                                                  | TCATTGAGTGCATCGTTGATG    | –                      |

---

|                |                                        |                        |                               |
|----------------|----------------------------------------|------------------------|-------------------------------|
| ath-miR397b    | Target gene is JAR1                    | TCATTGAGTGCATCGTTGATG  | –                             |
| ath-miR859     | Target gene is ABI                     | TCTCTCTGTTGTGAAGTCAAA  | –                             |
| ath-miR5632-5p | Target gene is MAPK1                   | TTGATTCTCTTATCCAAGTGT  | –                             |
| ath-miR1888a   | Target gene is PDI52                   | TAAGTTAAGATTTGTGAAGAA  | –                             |
| ath-miR5638a   | Target gene is RBOHC                   | ATACCAAACTCTCTCACTTT   | –                             |
| ath-miR398a-3p | Target gene is NRX1                    | TGTGTTCTCAGGTCACCCCTT  | –                             |
| ath-miR3434-3p | Target gene is TCTP                    | TCAGAGTATCAGCCATGTGA   | –                             |
| U6             | miRNAs expression level reference gene | TTGGACCATTCTCGATTTGTGC | CCTTAGGGGACATCCGATAAAA<br>TTG |

---

## 105 miRNA prediction

106 miRNAs that interact with mRNA are predicted in the Arabidopsis miRNA database using the  
 107 psRNATarget website ([http://plantgrn.noble.org/v1\\_psRNATarget/](http://plantgrn.noble.org/v1_psRNATarget/)).

## 108 RESULTS

### 109 Effect of Drought Stress on Antioxidant Enzyme Activity of *Zanthoxylum bungeanum*

110 Antioxidant enzymes are important roles in plant antioxidant systems. They can eliminate  
 111 reactive oxygen species in plants and avoid damage to plant plasma membranes. They are also  
 112 important indicators for evaluating plant antioxidant capacity. The activities of four antioxidant  
 113 enzymes, SOD, POD, CAT and APX, were determined under drought stress for 7 periods. The  
 114 results showed that the activity of SOD decreased slowly with the prolongation of drought stress,  
 115 while POD, CAT and APX decreased. It rose slowly within 6 hours of drought stress, and then



116 increased rapidly between 6h and 24h, and remained at a higher activity level after 24h (Figure  
117 1).

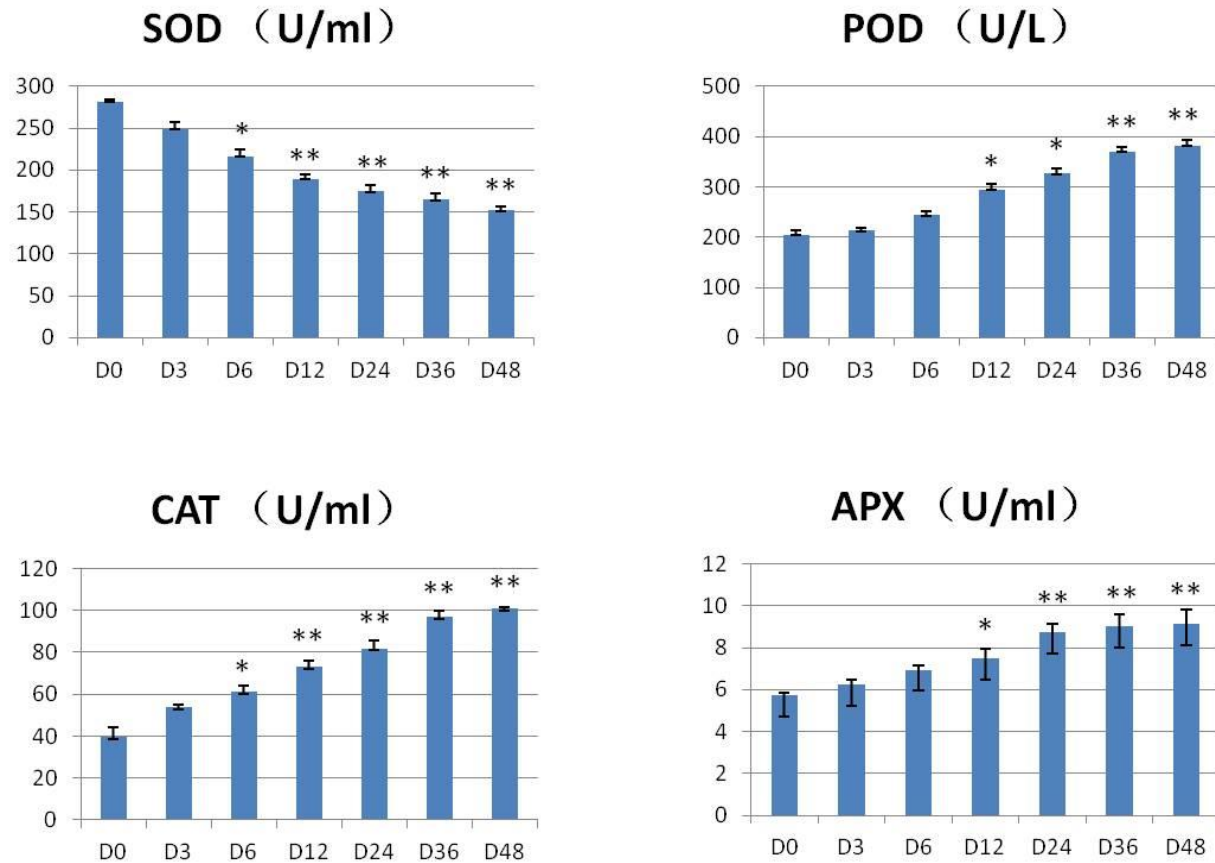

118

119 **Figure 1.** Antioxidant system enzyme activity. \* P<0.05; \*\* P<0.01

120 The changes in the activity of the four enzymes under drought stress indicate that the  
121 response of antioxidant enzymes to drought requires reaction time, and it may be necessary to  
122 reach a certain amount of signal to activate the activities of antioxidant enzymes and synthetic  
123 pathways. In addition, once activated, antioxidant enzymes are not endlessly synthesized, but  
124 remain in a range after a period of drought stress.

125 Proline is one of the important protective substances for plants to resist stress. Usually,  
126 when plants are subjected to abiotic stress, they will synthesize proline in large quantities to cope  
127 with adverse environment. Malondialdehyde (MDA) is produced by the peroxidation of  
128 membrane lipids in tissues or organs of plants when they are aging or under drought. Therefore,  
129 the content of proline and MDA is an important indicator for evaluating plant stress resistance.

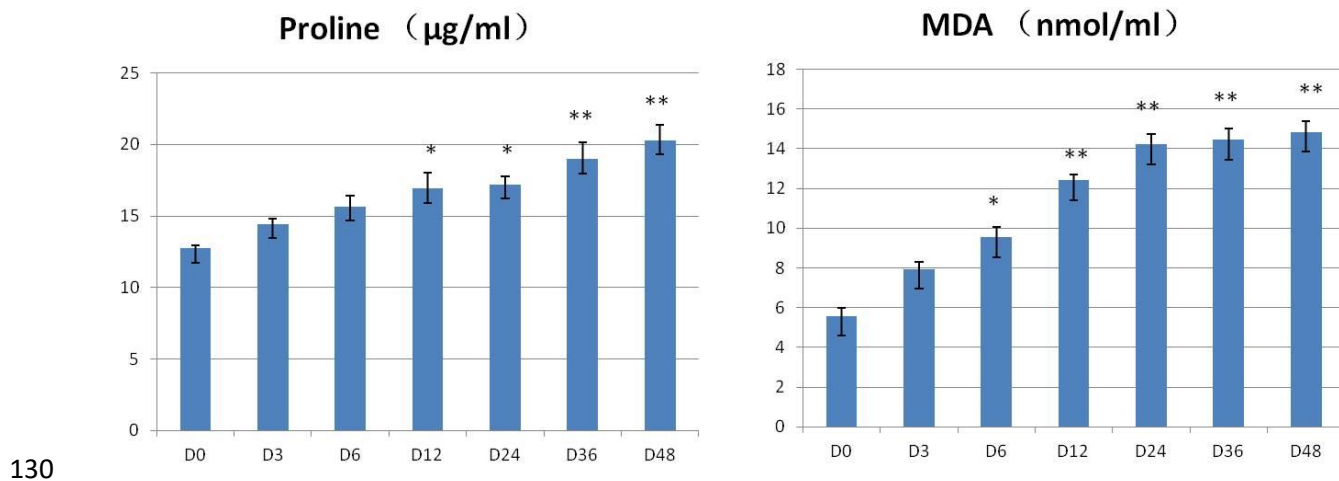

130

131 **Figure 2.** Proline and MDA contents. \* P<0.05; \*\* P<0.01

132 The proline content in *Zanthoxylum bungeanum* was gradually increased from 13 µg/ml at  
133 the initial stage of drought stress to 20 µg/ml at 48 h. The content of MDA changed more  
134 vigorously, and it quickly exceeded 12 nmol/ml within 12 hours, which was more than twice that  
135 of D0 period, and then remained above 14 nmol/ml for 24h to 48h (Figure 2). The increase of  
136 proline and MDA content indicates that in the process of drought stress of *Zanthoxylum*  
137 *bungeanum*, on the one hand, the peroxidation of organ membrane lipids affects the  
138 physiological function of plants, on the other hand, the protective substances are also synthesized  
139 to slow down the damage of plants caused by adverse environment.

140 **Expression pattern of miRNAs and their target genes under drought stress**

141 The expression patterns of genes related to the antioxidant system were essentially consistent  
142 with the changes in the related substances. Genes such as *PRX2E*, *CAT*, *APX3*, *P5CS* and *GPX1*  
143 showed a significant increase under drought stress (Figure 3).

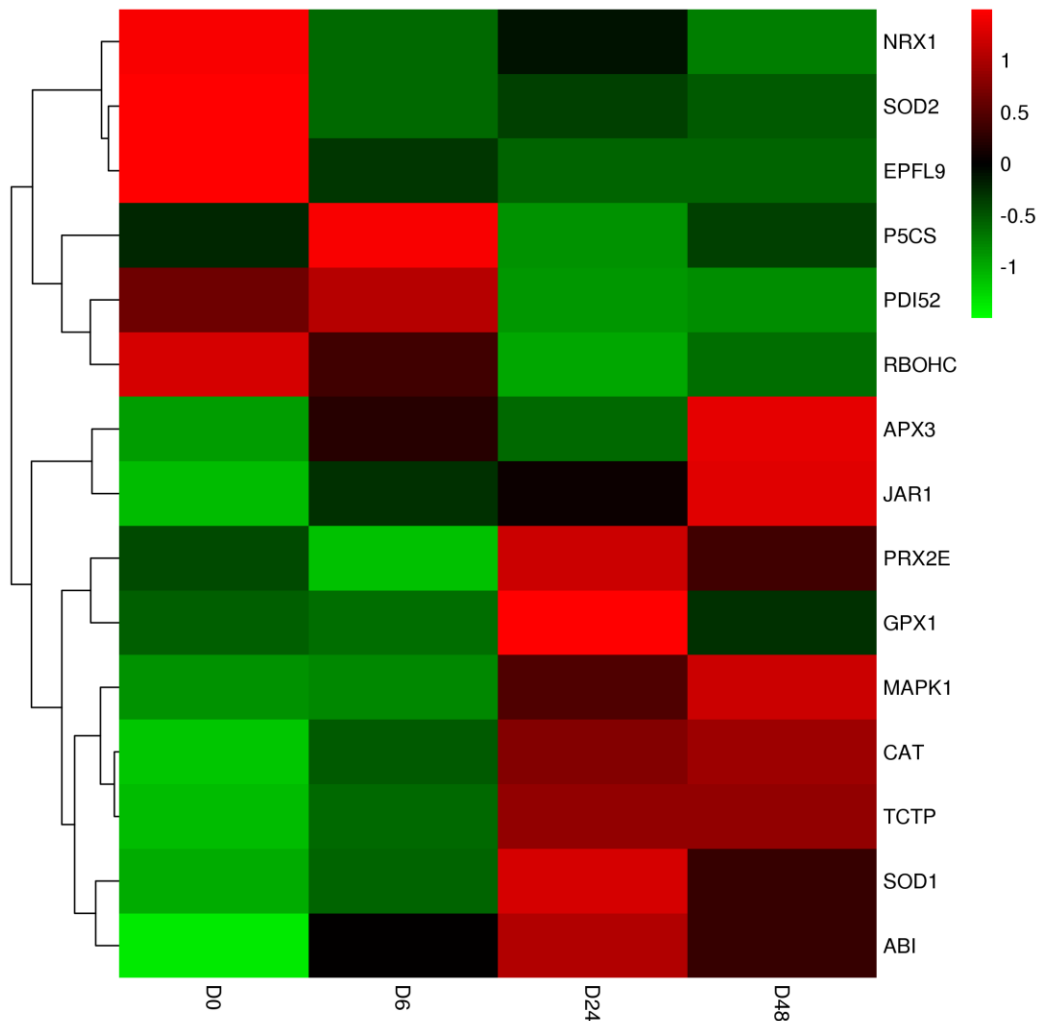

144

145 **Figure 3.** Heat map of gene expressions relating to the antioxidant system.

146 miRNAs interacting with mRNAs were predicted via the psRNATarget website (Table 2).

147 The predicted results indicate that ath-miR396a-5p binds to *SOD1* and inhibits its transcription.

148 Ath-miR167a-3p interacts with *PRX2E*, and *CAT* is the target gene of ath-miR169b-3p. In  
149 addition, we also predicted miRNAs interacting with other genes on the drought stress-related  
150 signaling pathway, involving jasmonic acid signaling pathway, ABA signaling pathway, MAPK  
151 signaling pathway and proline synthesis pathway. Furthermore, the relative expression levels of  
152 miRNAs regulating the genes involved in the synthesis of antioxidant enzymes were detected.  
153 The results showed that the expression trends of miRNAs and their target genes were basically  
154 negatively correlated (Figure 4). It can be stated that these miRNAs are important regulators  
155 involved in the antioxidant system of *Z. bungeanum*.

156 **Table 2.** miRNAs and their target genes.

| miRNA          | Mutant                 | Target gene  |
|----------------|------------------------|--------------|
| ath-miR396a-5p | UUCCACAGCUUUCUUGAACUG  | <i>SOD1</i>  |
| ath-miR834     | UGGUAGCAGUAGCGGUGGUAA  | <i>SOD2</i>  |
| ath-miR167a-3p | GAUCAUGUUCGCAGUUUCACC  | <i>PRX2E</i> |
| ath-miR169b-3p | GGCAAGUUGUCCUUCGGCUACA | <i>CAT</i>   |
| ath-miR447a-3p | UUGGGGACGAGAUGUUUUGUUG | <i>APX3</i>  |
| ath-miR773b-3p | UUUGAUUCCAGCUUUUGUCUC  | <i>GPX1</i>  |
| ath-miR397b    | UCAUUGAGUGCAUCGUUGAUG  | <i>P5CS</i>  |
| ath-miR397b    | UCAUUGAGUGCAUCGUUGAUG  | <i>JAR1</i>  |
| ath-miR859     | UCUCUCUGUUGUGAAGUCAAA  | <i>ABI</i>   |

---

|                |                       |              |
|----------------|-----------------------|--------------|
| ath-miR5632-5p | UUGAUUCUCUUAUCCAACUGU | <i>MAPK1</i> |
| ath-miR1888a   | UAAGUUAAGAUUUGUGAAGAA | <i>PDI52</i> |
| ath-miR5638a   | AUACCAAACUCUCUCACUUU  | <i>RBOHC</i> |
| ath-miR398a-3p | UGUGUUCUCAGGUCACCCCUU | <i>NRX1</i>  |
| ath-miR3434-3p | UCAGAGUAUCAGCCAUGUGA  | <i>TCTP</i>  |

---

157

158       The expression levels of the SOD gene in chloroplasts and mitochondria were monitored  
159 and we found the *SOD2* gene in the chloroplast was positively correlated with superoxide  
160 dismutase activity. The *SOD1* gene in mitochondria was negatively correlated with the activity  
161 of superoxide dismutase. It is concluded that the superoxide dismutase produced by *Z.*  
162 *bungeanum* under drought stress comes mainly from the chloroplast.

163       In addition, some expression patterns of pathway genes activated by drought stress were  
164 also monitored. *P5CS* is a key enzyme in the proline synthesis process. *ABI* is a key inhibitor of  
165 the ABA signaling pathway and participates in the closure of stomata and *TCTP* is involved in  
166 ABA and calcium ion-mediated stomatal closure. In addition, the relative expression levels of  
167 *MAPK1* and *PDI52* were also up-regulated (Figure 4). At the same time, the relative expression  
168 of *JAR1*, a gene related to jasmonic acid synthesis, was also up-regulated under the induction of  
169 drought stress. However, other genes were inhibited, such as *RBOHC*, *NRX1*, *EPFL9*.

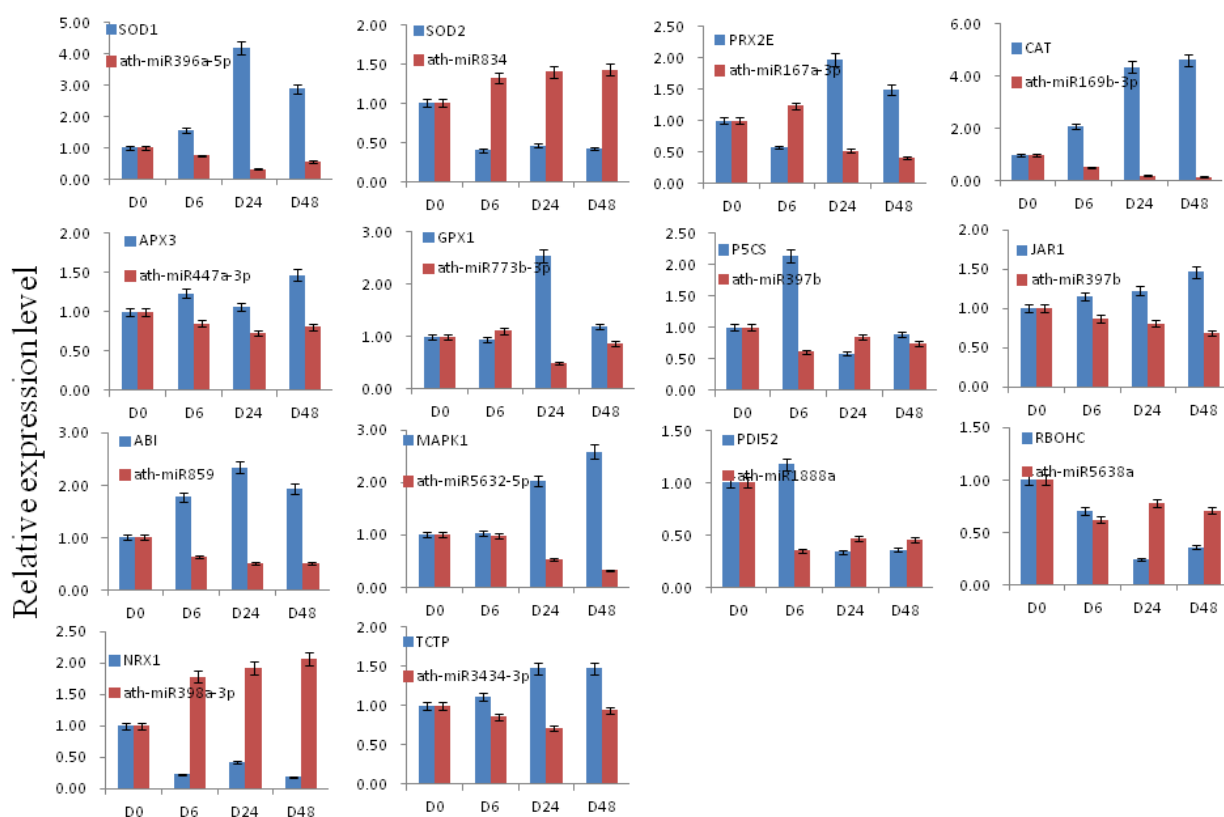

170

171 **Figure 4.** miRNAs and their target genes.

172

## 173 DISCUSSION

### 174 Response of antioxidant enzymes under drought stress

175 The results show that most of antioxidant enzymes trend upward under continuing drought stress,  
 176 while SOD shows a downward trend. The trend of the *SOD2* gene and SOD in the chloroplasts  
 177 are consistent, which indicates the chloroplast antioxidant system was severely damaged during  
 178 the drought. In addition, it can be explained that in the antioxidant system, several other

179 antioxidant enzymes (such as POD, CAT, APX) exert major antioxidant effects. Proline and  
180 MDA increased gradually during the drought stress and may also be involved in signal  
181 transduction and protection. Studies have shown that *Barbula fallax* and *Zanthoxylum*  
182 *bungeanum* have similar patterns of antioxidant enzyme activity, where SOD showed a  
183 downward trend in the early stage of drought stress, while POD and CAT activities were positive  
184 in response to drought stress and increased in the early stage of drought stress (Zhang et al.,  
185 2017). In many species, the activities of antioxidant enzymes such as SOD, POD, CAT, and  
186 APX generally rise under drought. Chickpea accumulates proline and increases the activity of  
187 SOD, APX, GPX and CAT under drought stress (Dalvi et al., 2017). The activities of SOD, POD  
188 and CAT in alfalfa increase significantly under drought stress (Tina et al., 2017). This also  
189 occurs in pea (Mittler. & Zilinskas., 1994), rice (Sharma & Dubey, 2005), Kentucky bluegrass  
190 (Bian & Jiang, 2009) and sesame (FAZELI. et al., 2007).

### 191 **Antioxidant signaling pathway regulatory factors interaction**

192 Many signal pathways are activated in plants under drought stress, including signal transduction,  
193 gene interaction, physiological changes and so on. Under drought stress, the accumulation of  
194 ROS in plants seriously affects the normal growth and development of plants. Antioxidant  
195 system can effectively prevent the damage caused by ROS produced by plants, and is an  
196 indispensable self-protection system for plants. It plays a very complex process in the antioxidant  
197 system, involving the synthesis of antioxidant enzymes, transcription and modification of  
198 functional genes, transport of ions, and so on. According to the experimental results and previous  
199 research results, the factors involved in the regulation of antioxidant system were analyzed and a  
200 signal regulation model of antioxidant system was constructed.

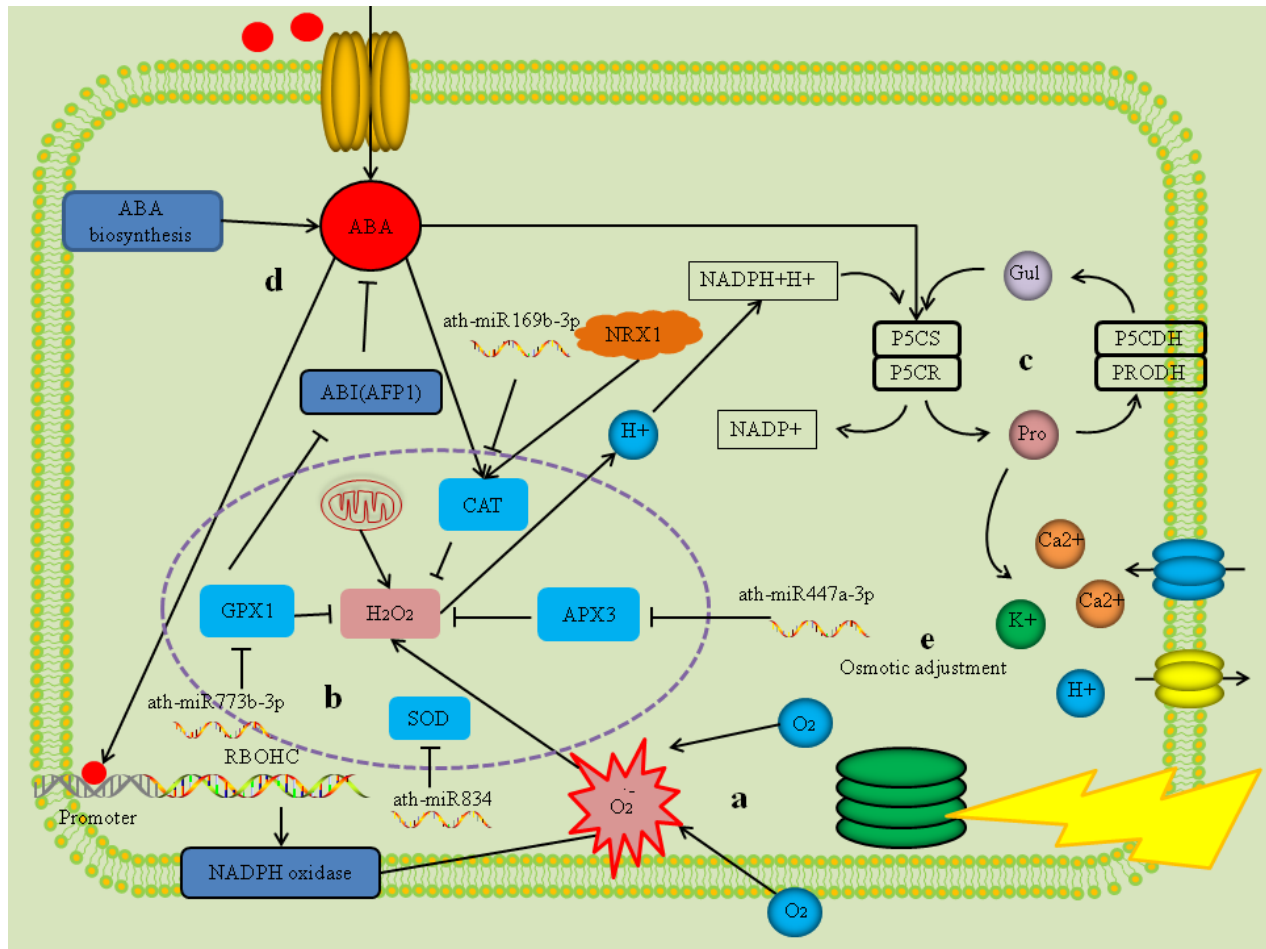

201

202 **Figure 5.** Antioxidant signaling pathway genes interaction model. (a) Oxygen produced by  
 203 photosynthesis and oxygen in vitro are the main sources of ROS. (b) SOD, POD, CAT, APX,  
 204 GPX convert superoxide anion to hydrogen peroxide and eventually decompose into oxygen and  
 205 water. (c) The antioxidative enzyme decomposes  $H^+$  produced by hydrogen peroxide as a  
 206 substrate for the synthesis of proline from glutamate. (d) ABA can bind to the *RBOHC* promoter  
 207 to promote the synthesis of NADPH oxidase. (e) Proline can regulate the concentration of ions in  
 208 cells.

209 Under drought, mitochondrial respiration can produce ROS. Oxygen produced by  
 210 chloroplast photosynthesis and external oxygen are also sources of ROS in plants (Figure 5a).



211 Reactive oxygen species can destroy cell membranes and interfere with normal growth of plants,  
212 while the accumulation of ROS is toxic to plants. The production of ROS activates the plant's  
213 antioxidant system. SOD, POD, CAT, APX, GPX and other enzymes can convert superoxide  
214 anion to H<sub>2</sub>O<sub>2</sub> and eventually decompose it into non-toxic H<sub>2</sub>O and O<sub>2</sub> (Wang et al., 2018, Duan  
215 et al., 2009) (Figure 5b).

216 In this process, miRNAs are involved in the regulation of the synthesis of antioxidant  
217 enzymes, directly inhibiting the transcription or degradation of the corresponding mRNA,  
218 resulting in a decrease in the amount of antioxidant enzyme synthesis. However, by analyzing  
219 the expression levels of miRNAs, the expression levels of miRNAs associated with antioxidant  
220 systems are mostly declining. The above analysis can show that in order to protect itself from  
221 ROS damage under drought stress, plants have largely relieved the inhibitory effect of miRNAs  
222 on antioxidant system. During the scavenging of H<sub>2</sub>O<sub>2</sub> by antioxidant enzymes, it is susceptible  
223 to oxidative stress, resulting in reduced clearance. NRX1 is able to reduce oxidized antioxidant  
224 enzymes and has a stable antioxidant system (Kneeshaw. et al., 2017). However, in the gene  
225 expression level study, the expression level of *NRX1* was down-regulated. It is concluded that  
226 drought interfered with the reduction of NRX1 against oxidase. The antioxidant system  
227 decomposes ROS to produce H<sup>+</sup>, which provides a substrate for glutamate synthesis in the  
228 proline pathway (Figure 5c).

229 Proline is an important osmo-regulatory substance, and the main way to regulate the  
230 osmotic potential is to regulate the concentration of ions in the cell. Proline produced under  
231 drought stress protects cells from damage by controlling the concentration of ions, and becomes  
232 an important regulator of plant self-protection (Tieleman et al., 2001, Woolfson et al., 1991).

233 *P5CS* is an important synthetic gene in the proline synthesis pathway, and *ath-miR397b* can  
234 inhibit the expression level of *P5CS*. Under drought stress, the relative expression level of *ath-*  
235 *miR397b* was decreased, which inhibited the inhibition of *P5CS* and promoted the synthesis of  
236 proline. The accumulation of ROS can activate the  $\text{Ca}^{2+}$  channel on the cell membrane(Figure  
237 5e), causing a large amount of  $\text{Ca}^{2+}$  to enter the cell, and so can increase the  $\text{Ca}^{2+}$  concentration  
238 of the guard cells and change their osmotic potential (Singh et al., 2017). At the same time, high  
239 concentration of  $\text{Ca}^{2+}$  can suppress the input of  $\text{K}^+$  and the output of  $\text{H}^+$ . In addition, *SLAC1*  
240 transports anions out (Vahisalu et al., 2008), resulting in an increase in the concentration of  
241 cations in the membrane. The combination of ABA and TCTP can induce stomatal closure, and  
242 CPK can phosphorylate CAT as well as promote stomatal closure (Zou et al., 2010).

243 At the same time, plants can also synthesize ABA under drought stress, and ABA can  
244 promote the synthesis of proline from glutamate, which eventually leads to a large accumulation  
245 of proline (Figure 5d) (Strizhov. et al., 1997). Proline is an important osmotic adjustment  
246 substance in plants, so the above reaction is beneficial, allowing plants to cope better with  
247 drought. ABA binds to the promoter of *RBOHC* and promotes the production of respiratory burst  
248 oxidase (NADPH oxidase) (Zhao. et al., 2001). NADPH oxidase (NOX) also activates  $\text{Ca}^{2+}$   
249 channels on the cell membrane (Kurusu et al., 2015). In addition, it has been shown to play an  
250 important protective role in plant drought stress, preventing leaves from being destroyed by ROS  
251 (Duan et al., 2009, Miller. et al., 2009). Under drought stress, the ABA signaling pathway and  
252 antioxidant system of plants are activated, and there is close interaction between them (Qi. et al.,  
253 2015, He et al., 2018). On the one hand, ABA can promote the synthesis of CAT and improve  
254 the efficiency of the antioxidant system. While, on the other hand, *GPXI* can inhibit *ABI*, thereby  
255 relieving the inhibition of ABA by plants (Lim et al., 2017).

256 **ACKNOWLEDGMENTS**

257           The authors would like to thank Yao Ma for his participation in the manuscript  
258 discussion. This study was financially supported by the National Key Research and  
259 Development Program Project Funding (2018YFD1000605).

260 **REFERENCES**

- 261 Bates LS, Waldren RP, Teare ID, 1973. Rapid determination of free proline for water-stress  
262 studies. *Plant Soil* **39**, 205–7.
- 263 Bian S, Jiang Y, 2009. Reactive oxygen species, antioxidant enzyme activities and gene  
264 expression patterns in leaves and roots of Kentucky bluegrass in response to drought stress and  
265 recovery. *Scientia Horticulturae* **120**, 264-70.
- 266 Chance. B, Maehly. AC, 1955. Assay of catalases and peroxidases. *Methods in Enzymology* **2**,  
267 764–75.
- 268 Cornic. G, 2000. Drought stress inhibits photosynthesis by decreasing stomatal aperture--not by  
269 affecting ATP synthesis. *Trends in Plant Science* **5**, 187-8.
- 270 Dalvi US, Naik RM, Lokhande PK, 2017. Antioxidant defense system in chickpea against  
271 drought stress at pre- and post- flowering stages. *Indian Journal of Plant Physiology* **23**, 16-23.
- 272 Duan ZQ, Bai L, Zhao ZG, *et al.*, 2009. Drought-stimulated activity of plasma membrane  
273 nicotinamide adenine dinucleotide phosphate oxidase and its catalytic properties in rice. *J Integr*  
274 *Plant Biol* **51**, 1104-15.
- 275 Fazeli. F, Ghorbanli. M, Niknam. V, 2007. Effect of drought on biomass, protein content, lipid  
276 peroxidation and antioxidant enzymes in two sesame cultivars. *Biologia Plantarum* **51**, 98-103.
- 277 Fei X, Shi Q, Yang T, Fei Z, Wei A, 2018. Expression Stabilities of Ten Candidate Reference

278 Genes for RT-qPCR in *Zanthoxylum bungeanum* Maxim. *Molecules* **23**.

279 Fu. J, Huang. B, 2001. Involvement of antioxidants and lipid peroxidation in the adaptation of  
280 two cool-season grasses to localized drought stress. *Environmental and Experimental Botany* **45**,  
281 105–14.

282 Garcí'a-Mata. C, Lamattina. L, 2001. Nitric Oxide Induces Stomatal Closure and Enhances the  
283 Adaptive Plant Responses against Drought Stress. *Plant Physiology* **126**, 1196-204.

284 Gill SS, Tuteja N, 2010. Reactive oxygen species and antioxidant machinery in abiotic stress  
285 tolerance in crop plants. *Plant Physiol Biochem* **48**, 909-30.

286 He F, Wang HL, Li HG, *et al.*, 2018. PeCHYR1, a ubiquitin E3 ligase from *Populus euphratica*,  
287 enhances drought tolerance via ABA-induced stomatal closure by ROS production in *Populus*.  
288 *Plant Biotechnol J* **16**, 1514-28.

289 Kneeshaw. S, Keyani. R, Delorme-Hinoux. V, *et al.*, 2017. Nucleoredoxin guards against  
290 oxidative stress by protecting antioxidant enzymes. *PNAS* **114**, 8414–9.

291 Kurusu T, Kuchitsu K, Tada Y, 2015. Plant signaling networks involving Ca(2+) and Rboh/Nox-  
292 mediated ROS production under salinity stress. *Front Plant Sci* **6**, 427.

293 Li J, Li Y, Yin Z, *et al.*, 2017. OsASR5 enhances drought tolerance through a stomatal closure  
294 pathway associated with ABA and H<sub>2</sub>O<sub>2</sub> signalling in rice. *Plant Biotechnol J* **15**, 183-96.

295 Lim IK, Choi JA, Kim EY, *et al.*, 2017. TIS21(/BTG2) inhibits doxorubicin-induced stress fiber-  
296 vimentin networks via Nox4-ROS-ABI2-DRF-linked signal cascade. *Cell Signal* **30**, 179-90.

297 Lima CS, Ferreira-Silva SL, Carvalho FEL, *et al.*, 2018. Antioxidant protection and PSII  
298 regulation mitigate photo-oxidative stress induced by drought followed by high light in cashew  
299 plants. *Environmental and Experimental Botany* **149**, 59-69.

300 Martin-Stpaul N, Delzon S, Cochard H, 2017. Plant resistance to drought depends on timely

301 stomatal closure. *Ecol Lett* **20**, 1437-47.

302 Miller. G, Schlauch. K, Tam. R, *et al.*, 2009. The Plant NADPH Oxidase RBOHD Mediates  
303 Rapid Systemic Signaling in Response to Diverse Stimuli. *Science Signaling* **2**, ra45.

304 Mittler. R, Zilinskas. BA, 1994. Regulation of pea cytosolic ascorbate peroxidase and other  
305 antioxidant enzymes during the progression of drought stress and following recovery from  
306 drought. *The Plant Journal* **5**, 397-405.

307 N. GC, K. RS, 1977. Superoxide dismutases: I . Occurrence in higher plants. *Plant Physiology*  
308 **59**, 309-14.

309 Panchuk, Ii, Volkov RA, Schoffl F, 2002. Heat stress- and heat shock transcription factor-  
310 dependent expression and activity of ascorbate peroxidase in Arabidopsis. *Plant Physiol* **129**,  
311 838-53.

312 Qi. W, Zhang. L, Feng. W, Xu. H, Wang. L, Jiao. Z, 2015. ROS and ABA Signaling Are Involved  
313 in the Growth Stimulation Induced by Low-Dose Gamma Irradiation in Arabidopsis Seedling.  
314 *Applied Biochemistry and Biotechnology* **175**, 1490–506.

315 Rong R, Cui MY, Zhang QL, *et al.*, 2016. Anesthetic constituents of *Zanthoxylum bungeanum*  
316 Maxim.: A pharmacokinetic study. *J Sep Sci* **39**, 2728-35.

317 Sharma P, Dubey RS, 2005. Drought Induces Oxidative Stress and Enhances the Activities of  
318 Antioxidant Enzymes in Growing Rice Seedlings. *Plant Growth Regulation* **46**, 209-21.

319 Singh R, Parihar P, Singh S, Mishra RK, Singh VP, Prasad SM, 2017. Reactive oxygen species  
320 signaling and stomatal movement: Current updates and future perspectives. *Redox Biol* **11**, 213-8.

321 Strizhov. N, Braha´M. EA, Sz. LSOK, *et al.*, 1997. Differential expression of two P5CS genes  
322 controlling proline accumulation during salt-stress requires ABA and is regulated by ABA1,

- 323 ABI1 and AXR2 in Arabidopsis. *The Plant Journal* **12**, 557–69.
- 324 Tieleman D, Shrivastava I, Ulmschneider M, Sansom M, 2001. Proline-induced hinges in  
325 transmembrane helices: Possible roles in ion channel gating. *Proteins-structure Function &*  
326 *Bioinformatics* **44**, 63.
- 327 Tina RR, Shan XR, Wang Y, *et al.*, 2017. Response of antioxidant system to drought stress and  
328 re-watering in Alfalfa during branching. *IOP Conference Series: Earth and Environmental*  
329 *Science* **94**, 012129.
- 330 Vahisalu T, Kollist H, Wang YF, *et al.*, 2008. SLAC1 is required for plant guard cell S-type anion  
331 channel function in stomatal signalling. *Nature* **452**, 487-91.
- 332 Wang Y, Branicky R, Noe A, Hekimi S, 2018. Superoxide dismutases: Dual roles in controlling  
333 ROS damage and regulating ROS signaling. *J Cell Biol* **217**, 1915-28.
- 334 Woolfson DN, Mortishire-Smith RJ, Williams DH, 1991. Conserved positioning of proline  
335 residues in membrane-spanning helices of ion-channel proteins. *Biochem Biophys Res Commun*  
336 **175**, 733-7.
- 337 Yang LC, Li R, Tan J, Jiang ZT, 2013. Polyphenolics composition of the leaves of *Zanthoxylum*  
338 *bungeanum* Maxim. grown in Hebei, China, and their radical scavenging activities. *J Agric Food*  
339 *Chem* **61**, 1772-8.
- 340 Zhang WJ, Guo SS, You CX, *et al.*, 2016a. Chemical Composition of Essential Oils from  
341 *Zanthoxylum bungeanum* Maxim. and Their Bioactivities against *Lasioderma serricorne*. *J Oleo*  
342 *Sci* **65**, 871-9.
- 343 Zhang X, Li K, Xing R, *et al.*, 2018. miRNA and mRNA Expression Profiles Reveal Insight into  
344 Chitosan-Mediated Regulation of Plant Growth. *J Agric Food Chem* **66**, 3810-22.
- 345 Zhang X, Zhao Y, Wang S, 2017. Responses of antioxidant defense system of epilithic mosses to

346 drought stress in karst rock desertified areas. *Acta Geochimica* **36**, 205-12.

347 Zhang Y, Luo Z, Wang D, He F, Li D, 2014. Phytochemical profiles and antioxidant and  
348 antimicrobial activities of the leaves of *Zanthoxylum bungeanum*. *ScientificWorldJournal* **2014**,  
349 181072.

350 Zhang Z, Liu J, Shen P, *et al.*, 2016b. *Zanthoxylum bungeanum* pericarp extract prevents dextran  
351 sulfate sodium-induced experimental colitis in mice via the regulation of TLR4 and TLR4-  
352 related signaling pathways. *Int Immunopharmacol* **41**, 127-35.

353 Zhao. Z, Chen. G, Zhang. C, 2001. Interaction between reactive oxygen species and nitric oxide  
354 in drought-induced abscisic acid synthesis in root tips of wheat seedlings. *Australian Journal of*  
355 *Plant Physiology* **28**, 1055–61.

356 Zou JJ, Wei FJ, Wang C, *et al.*, 2010. Arabidopsis calcium-dependent protein kinase CPK10  
357 functions in abscisic acid- and Ca<sup>2+</sup>-mediated stomatal regulation in response to drought stress.  
358 *Plant Physiol* **154**, 1232-43.

359

## SOD (U/ml)

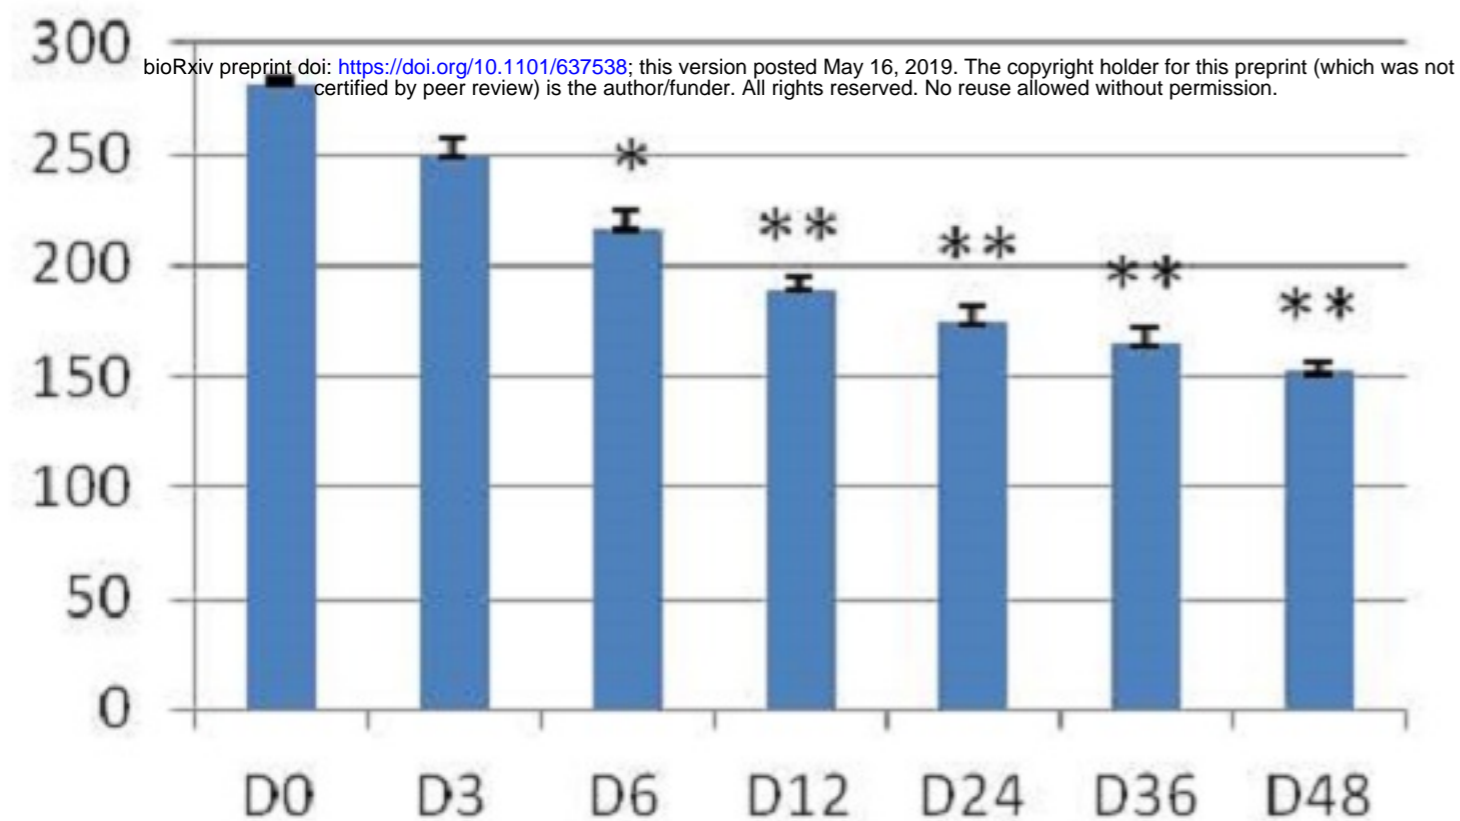

## POD (U/L)

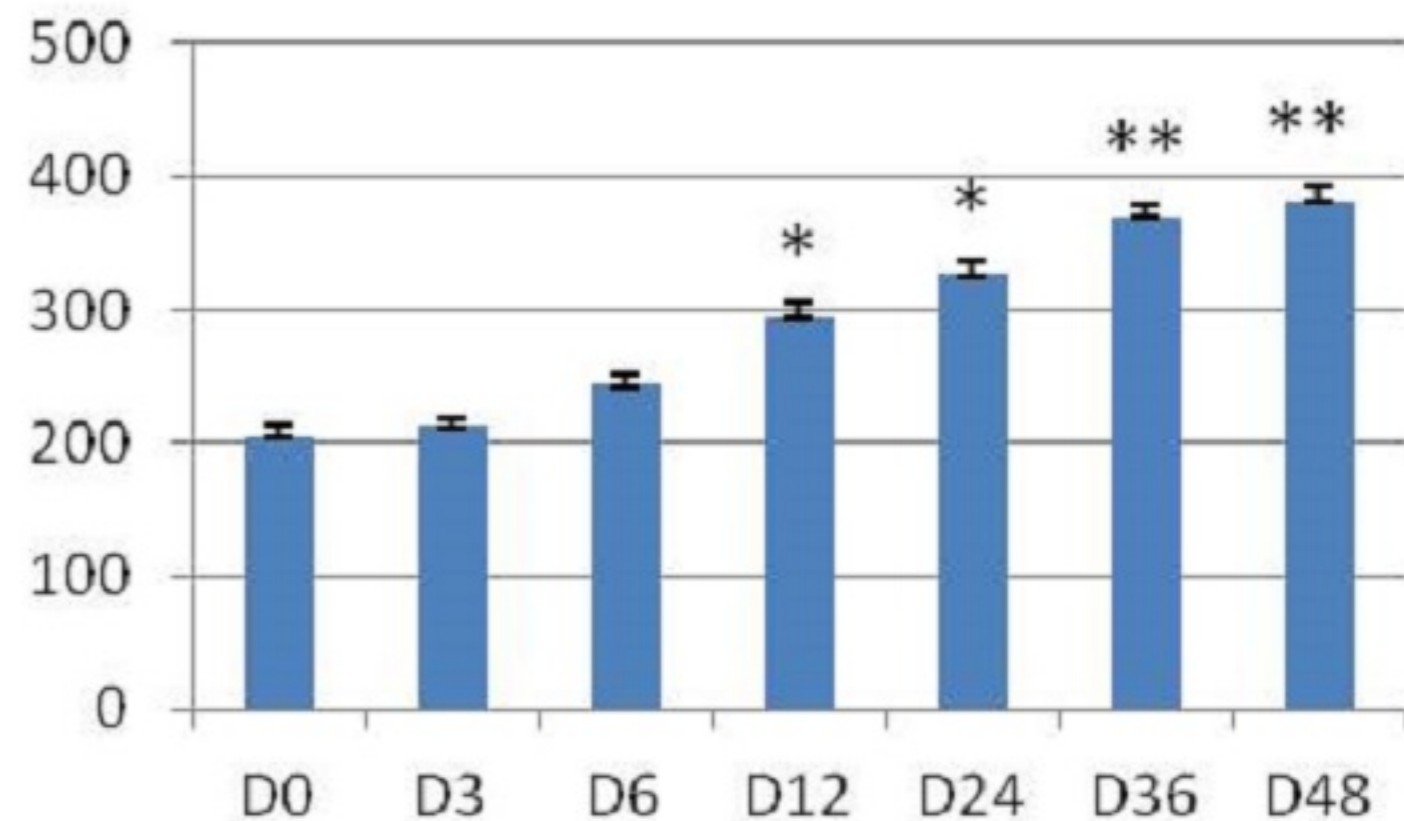

## CAT (U/ml)

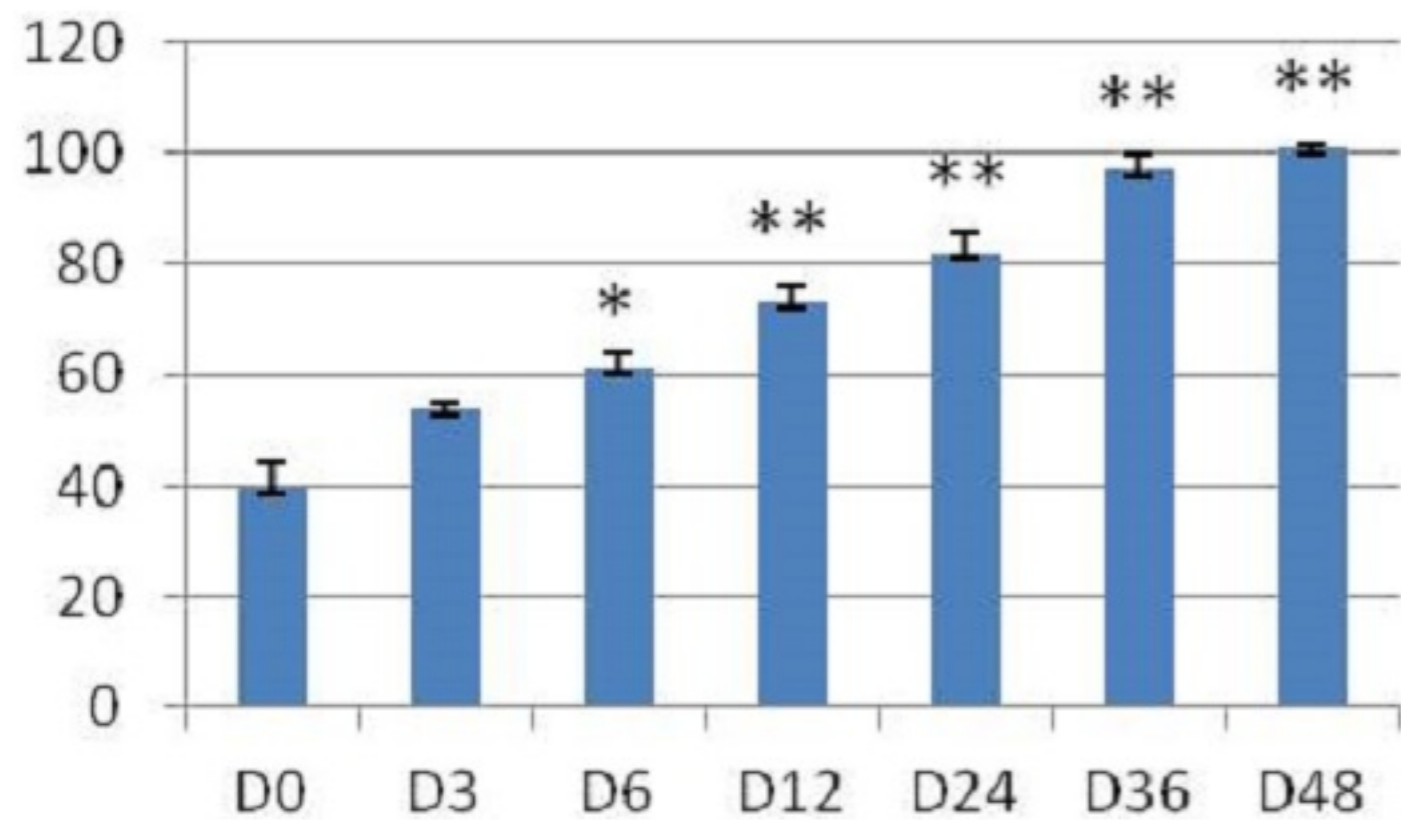

## APX (U/ml)

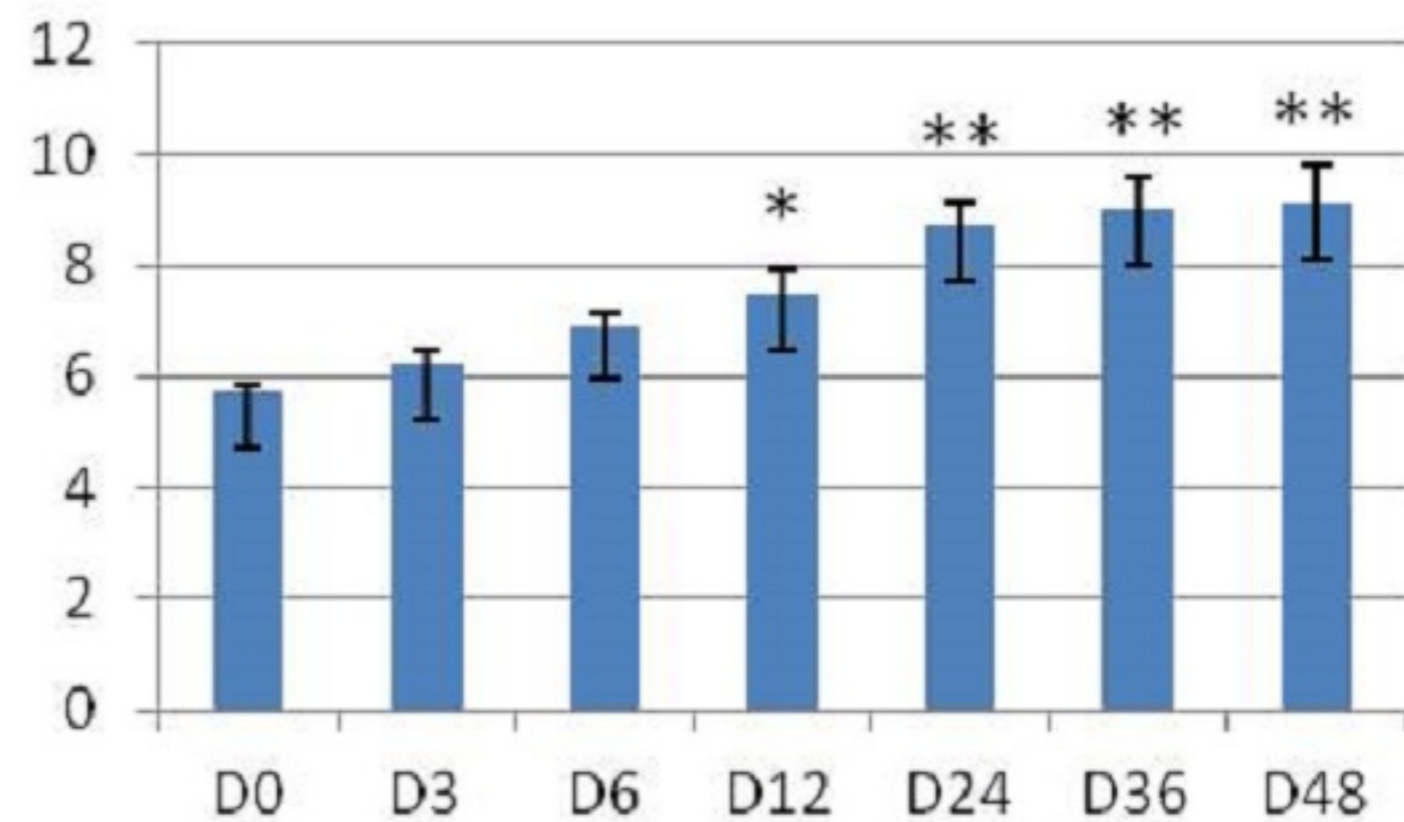



## Proline ( $\mu\text{g/ml}$ )

bioRxiv preprint doi: <https://doi.org/10.1101/637538>; this version posted May 16, 2019. The copyright holder for this preprint (which was not certified by peer review) is the author/funder. All rights reserved. No reuse allowed without permission.

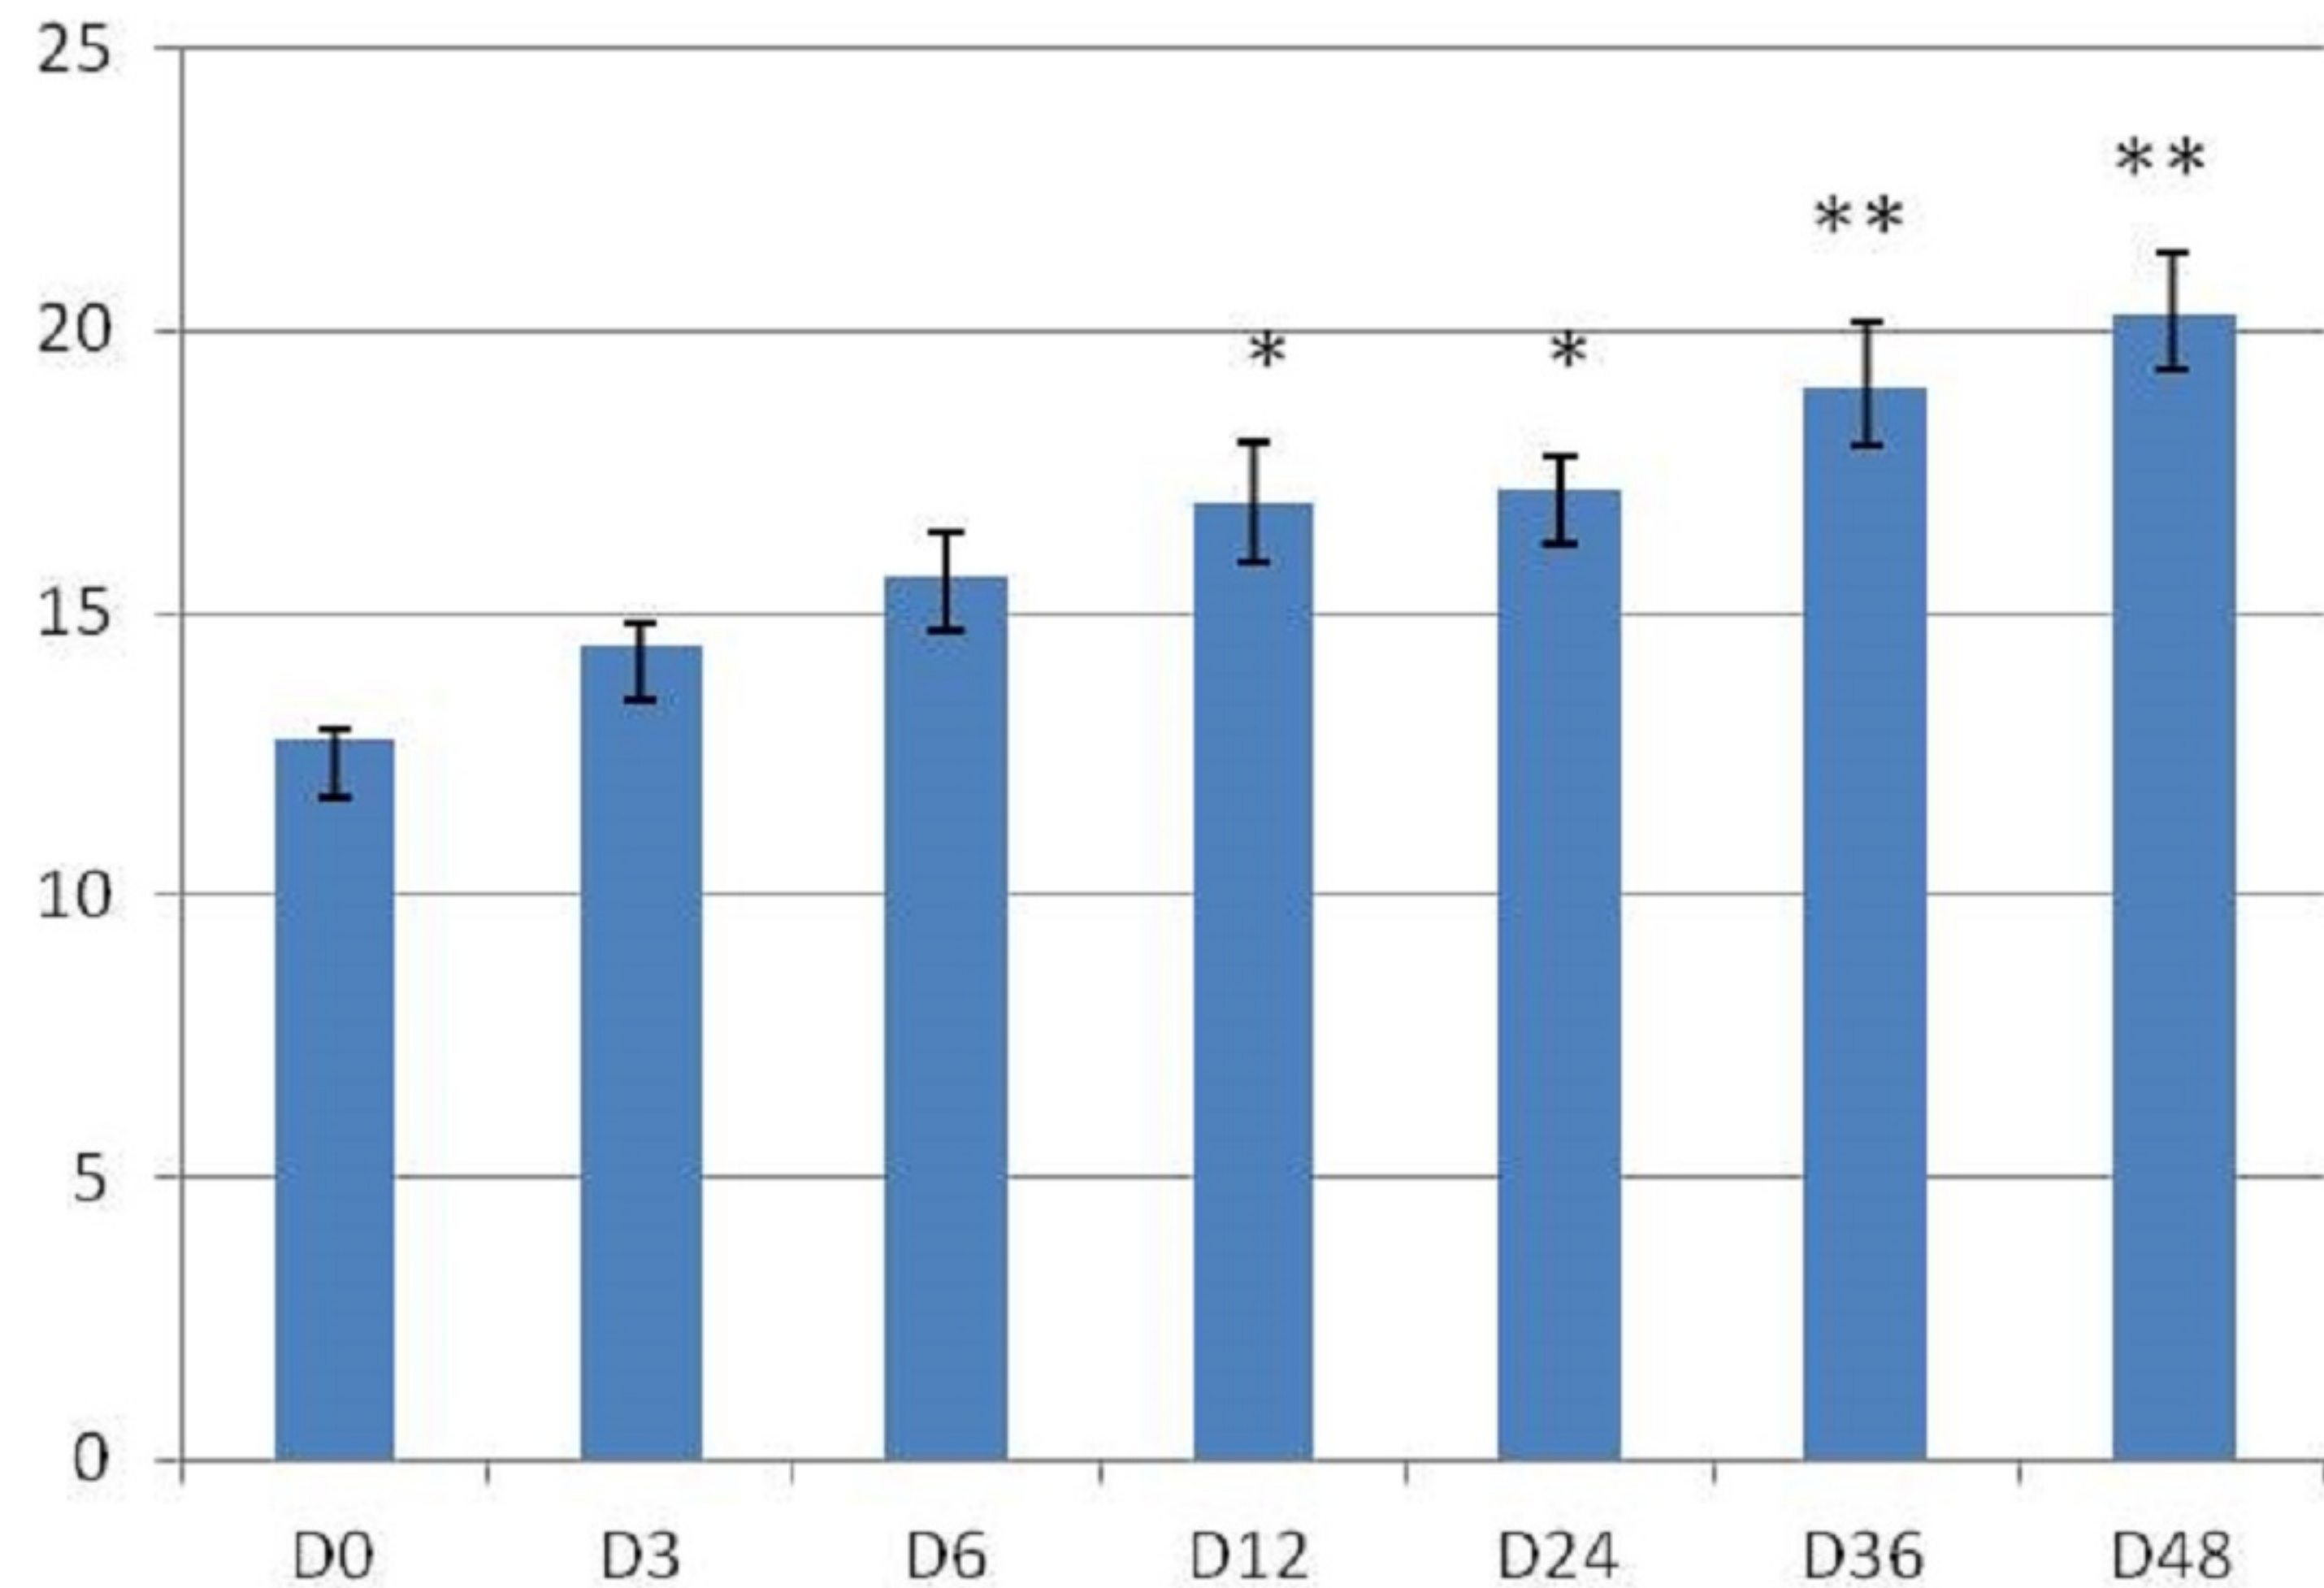

## MDA (nmol/ml)

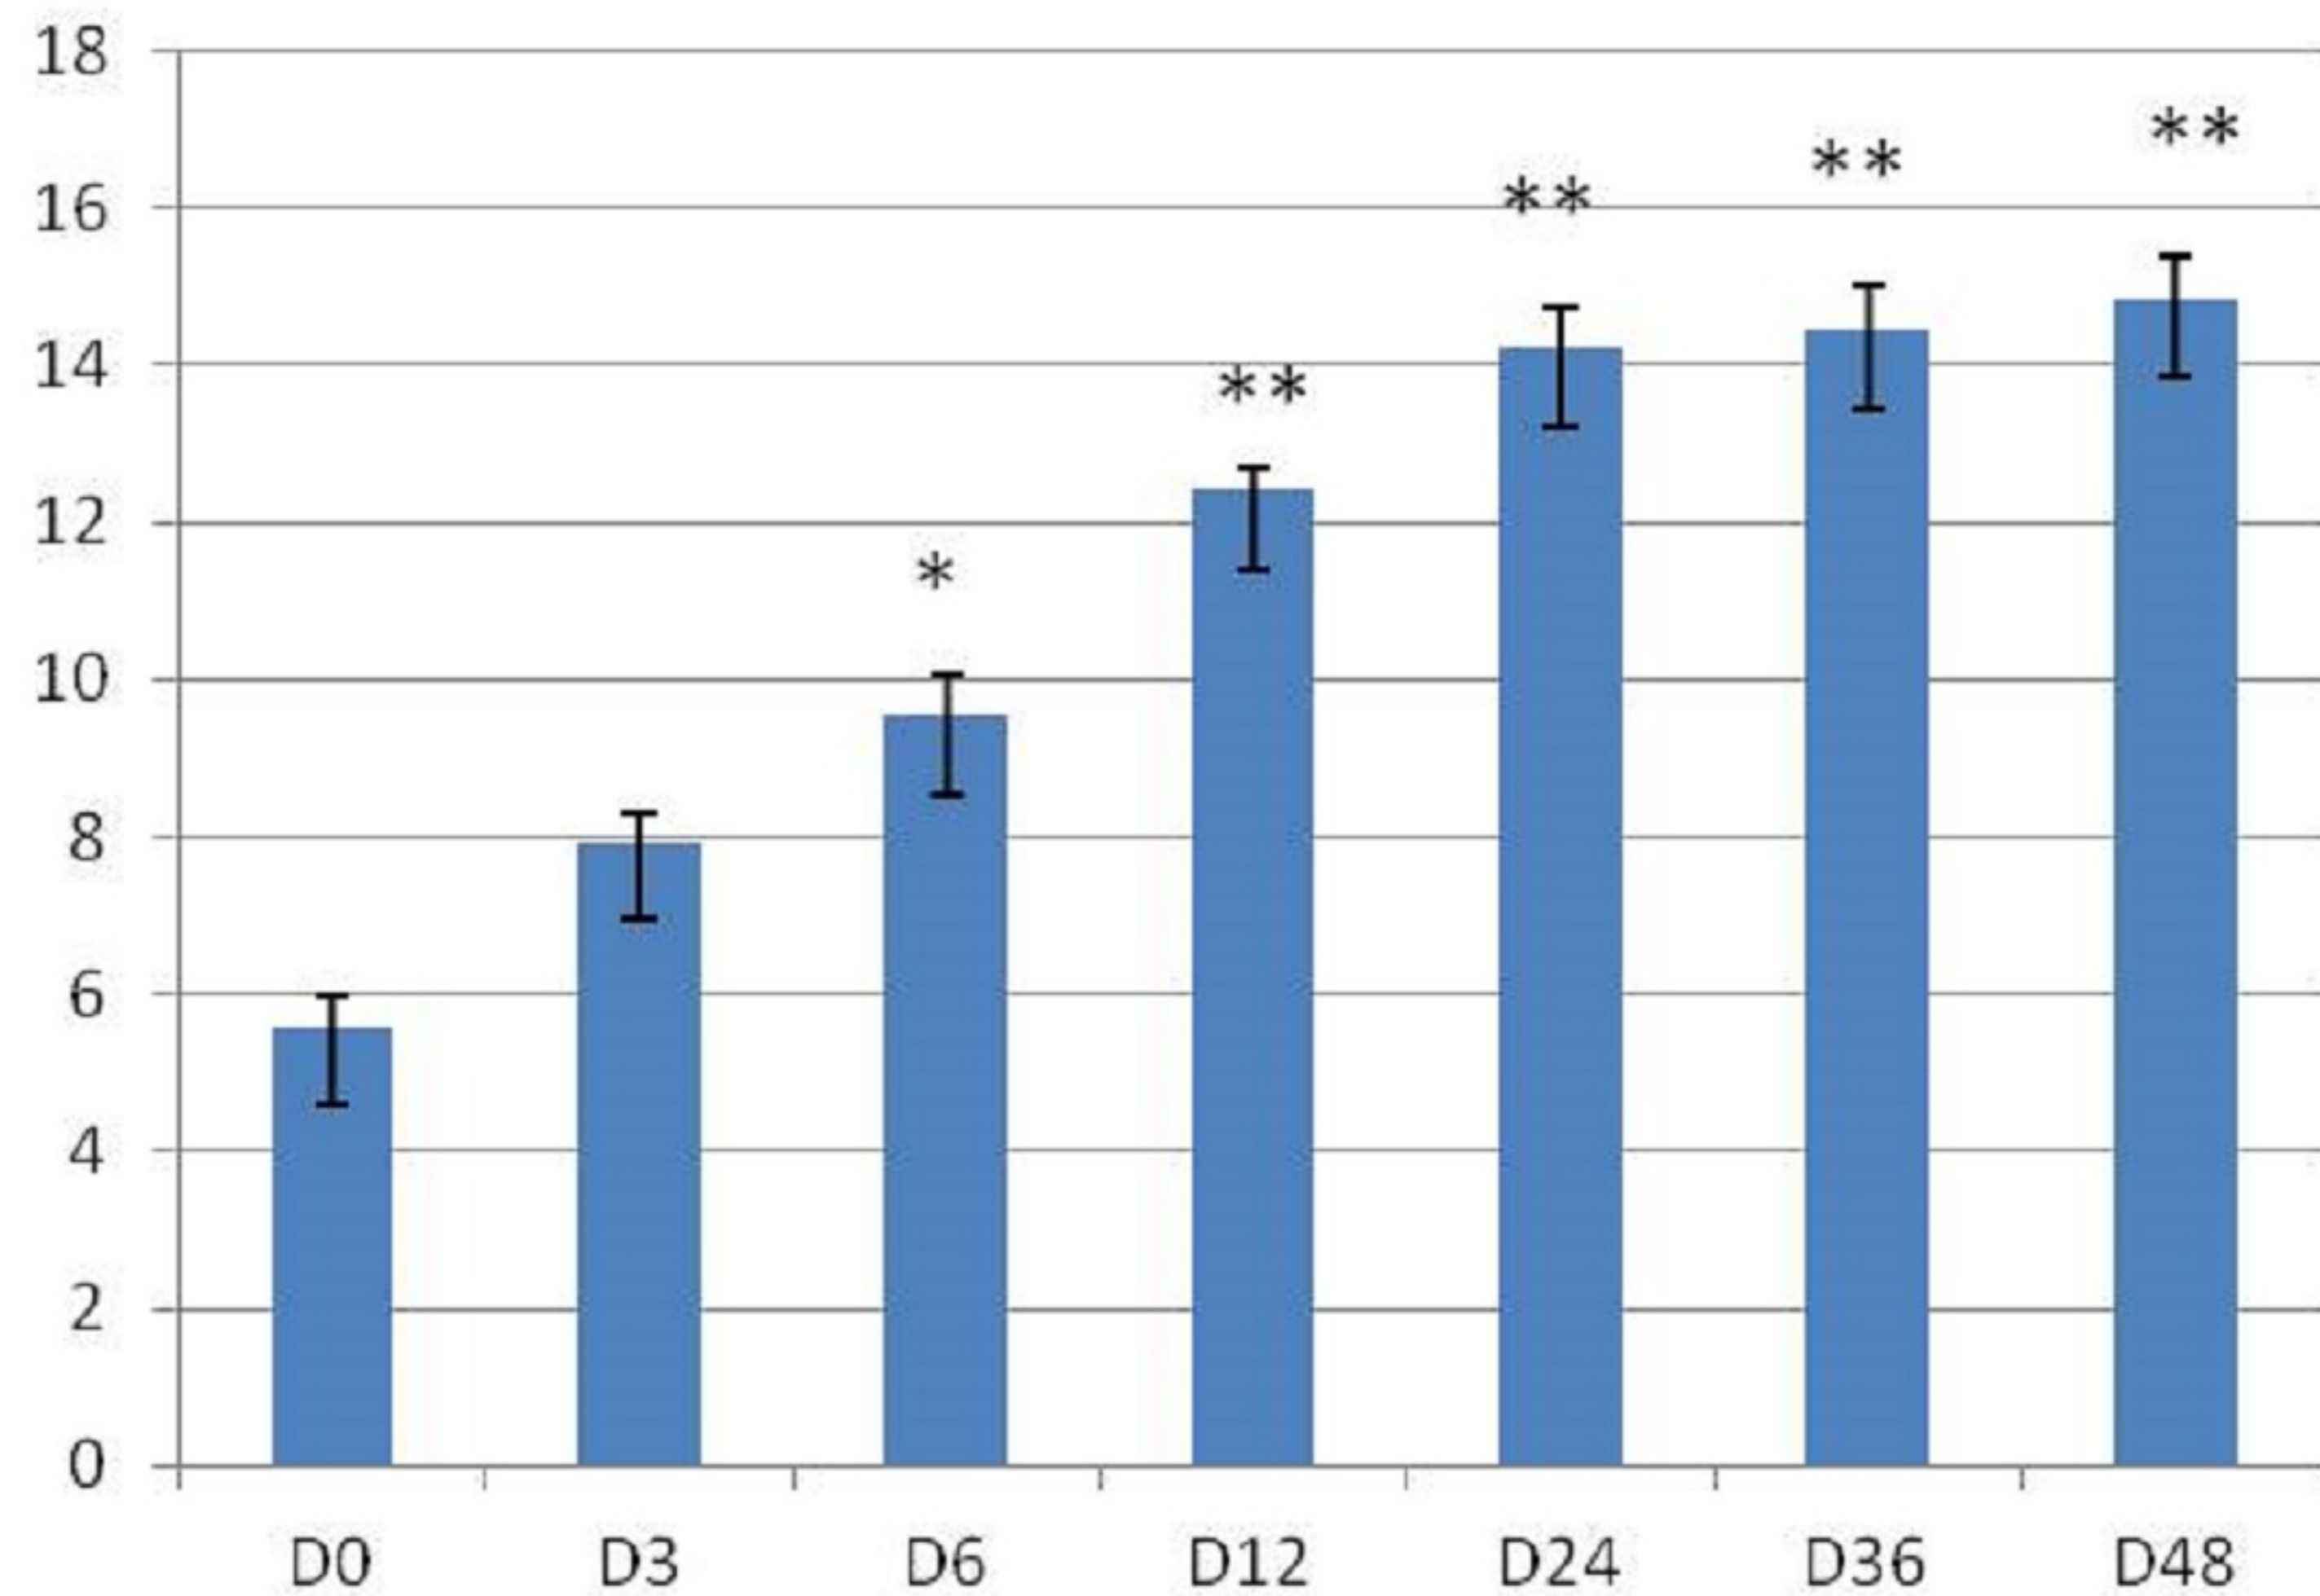

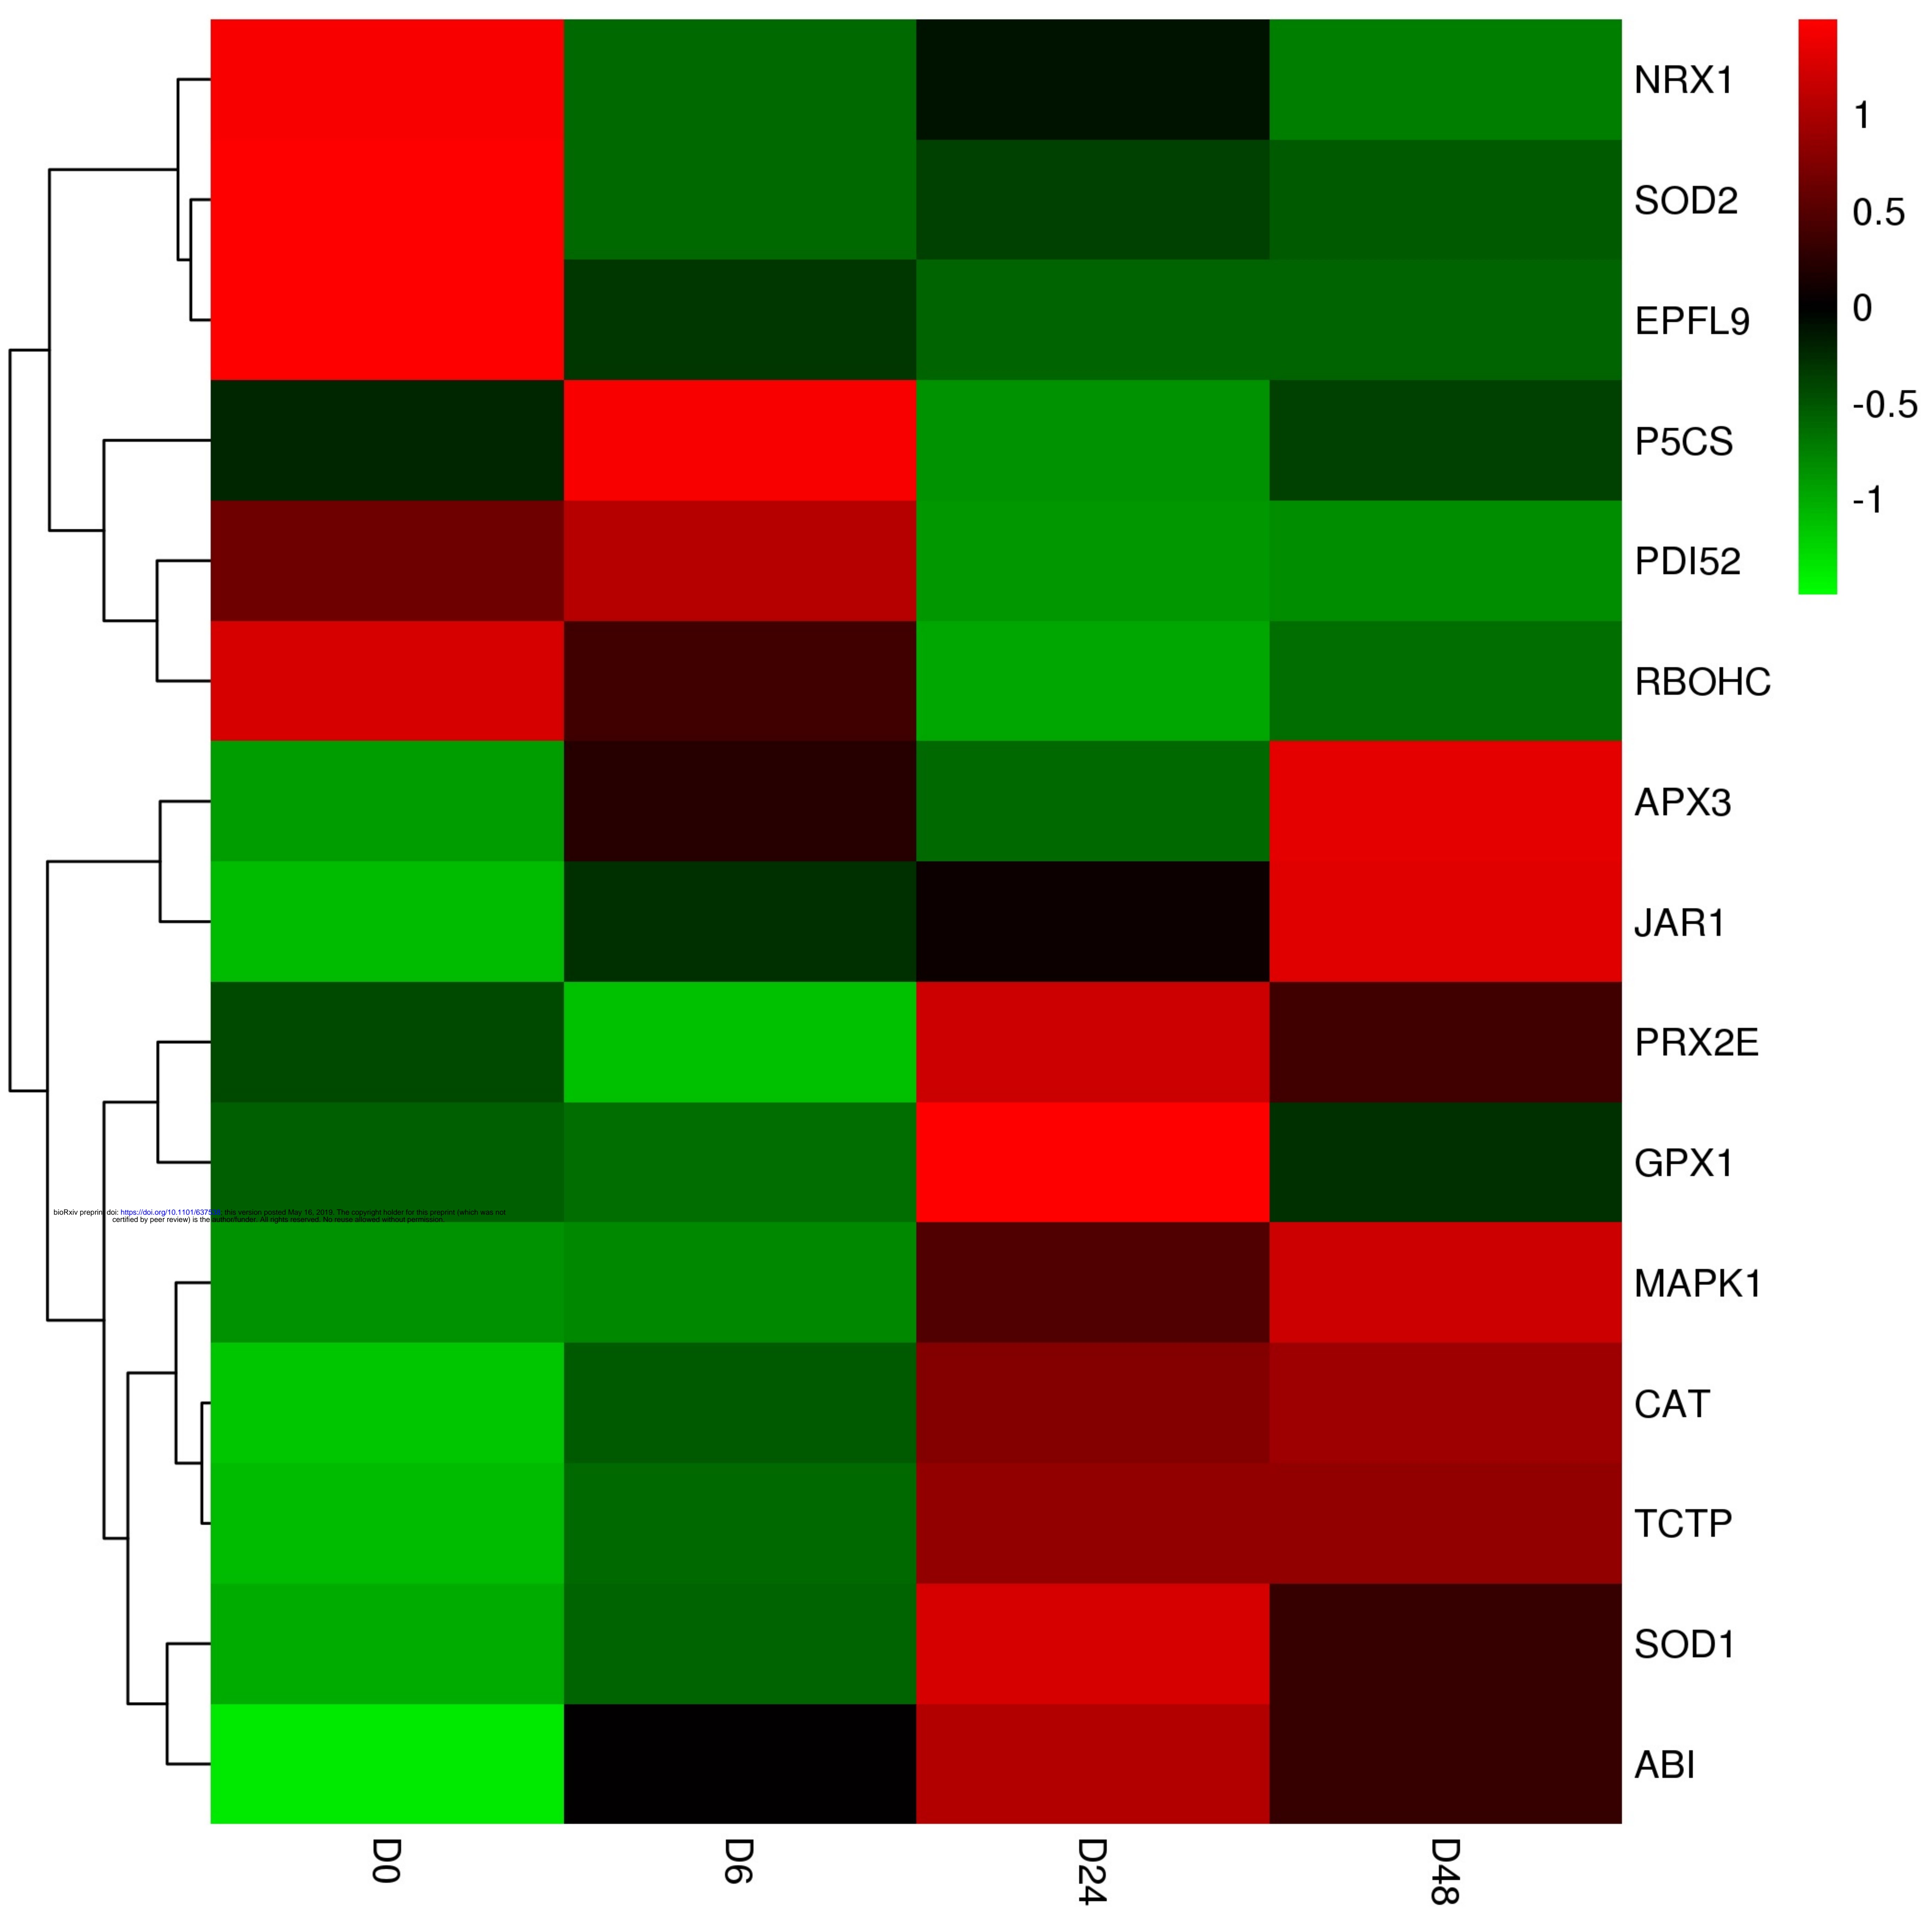

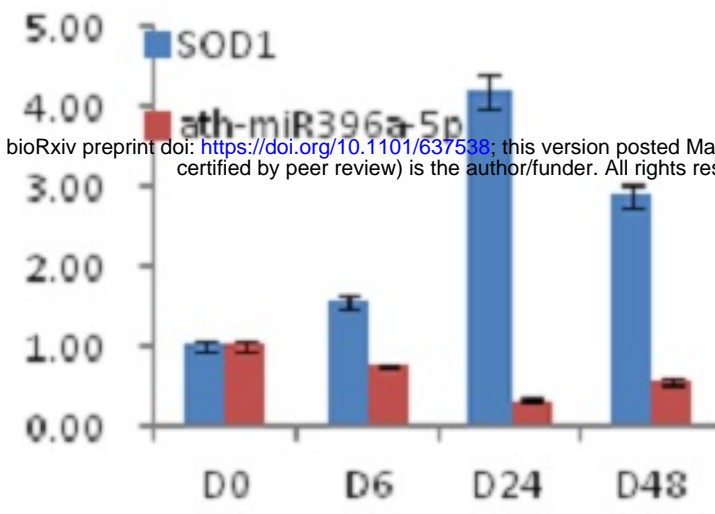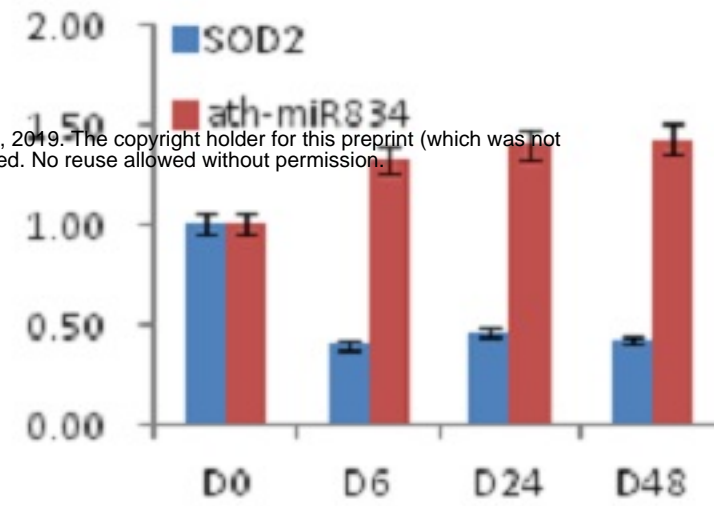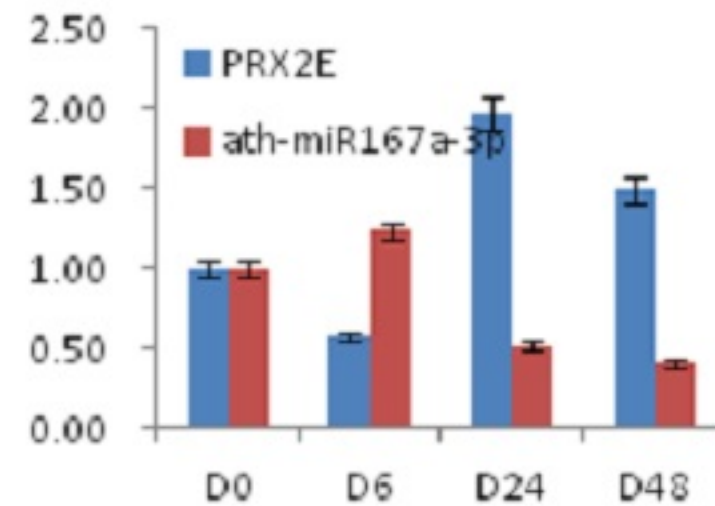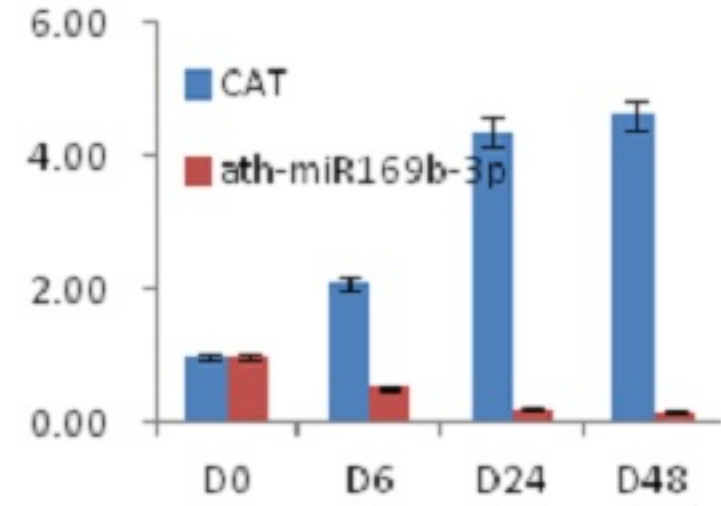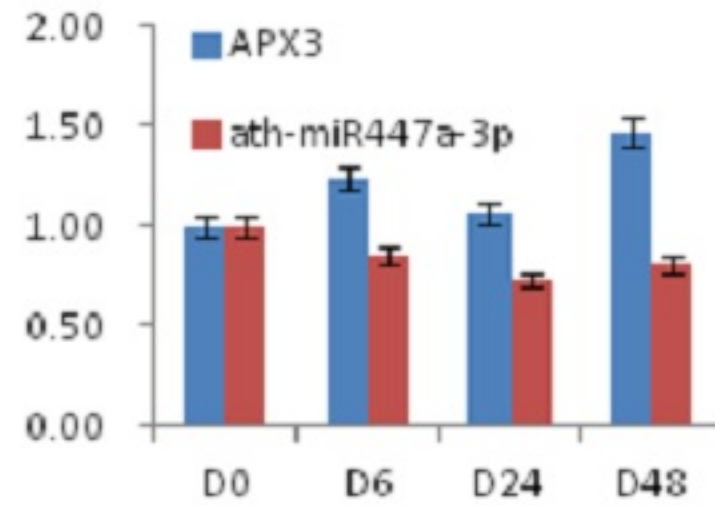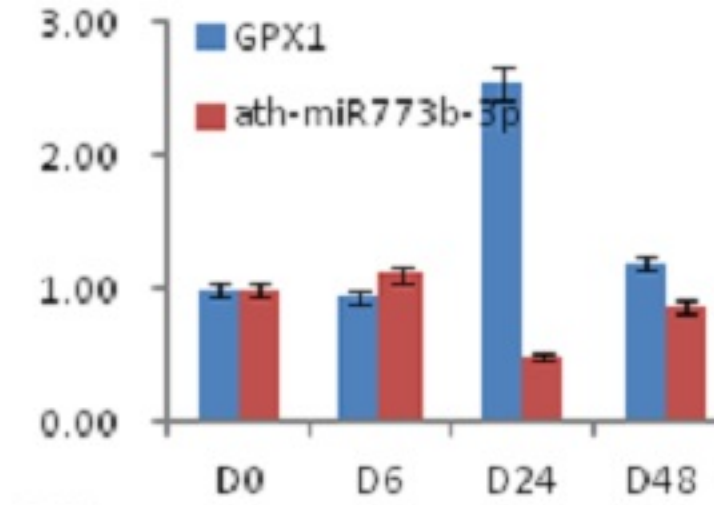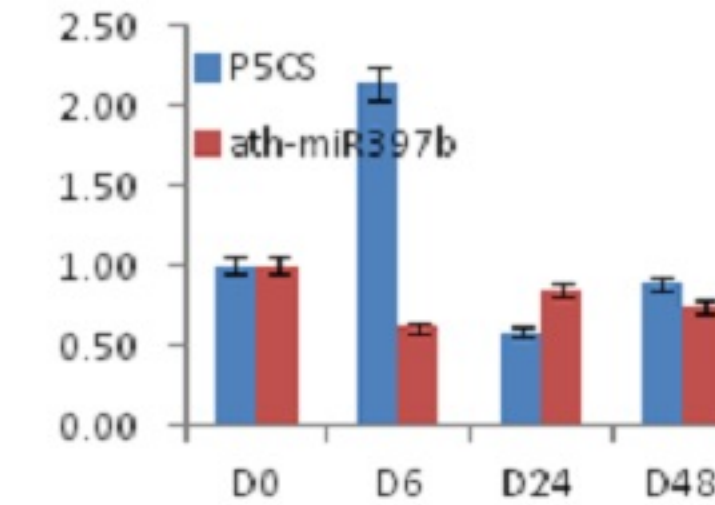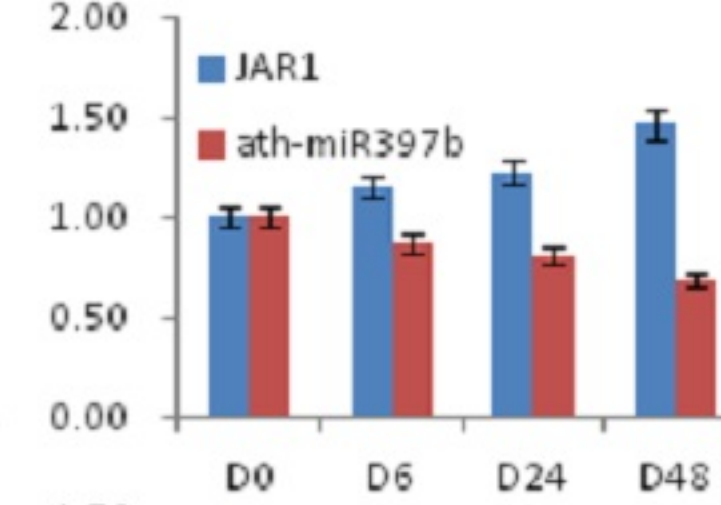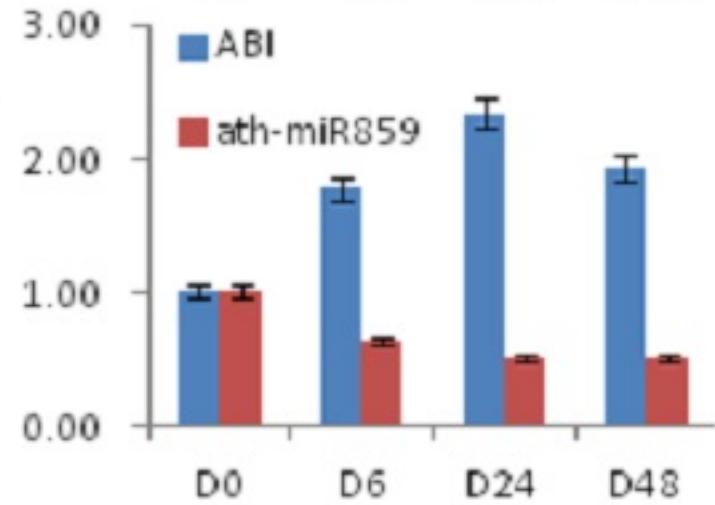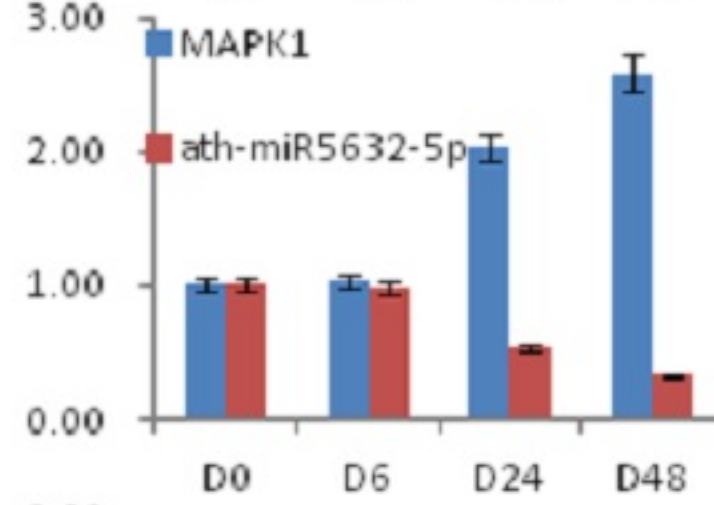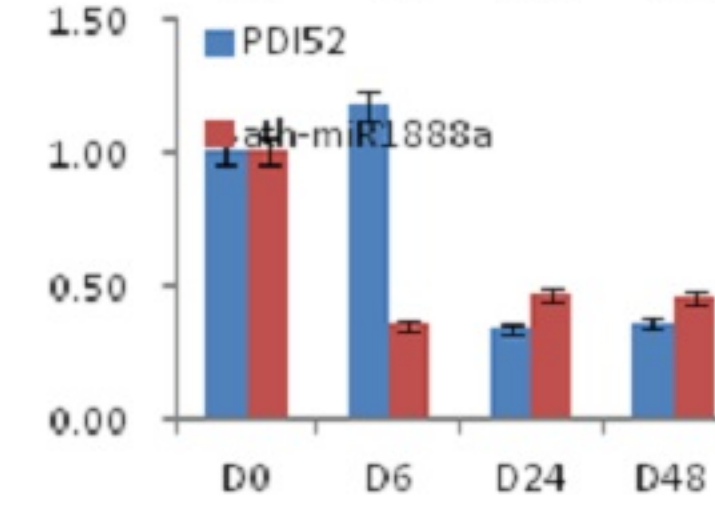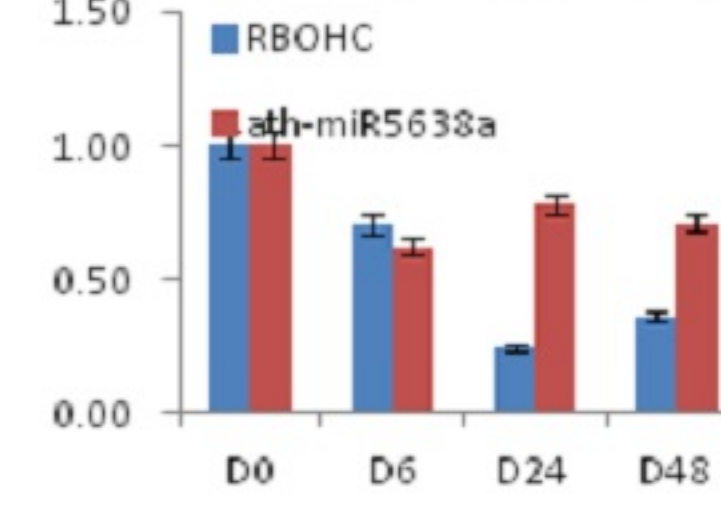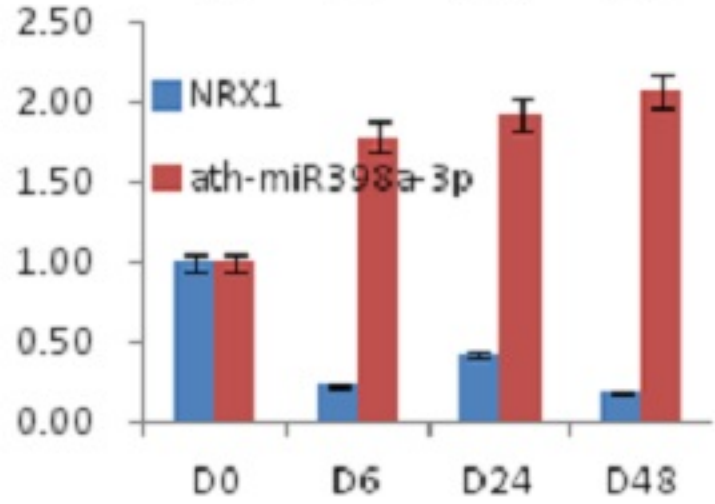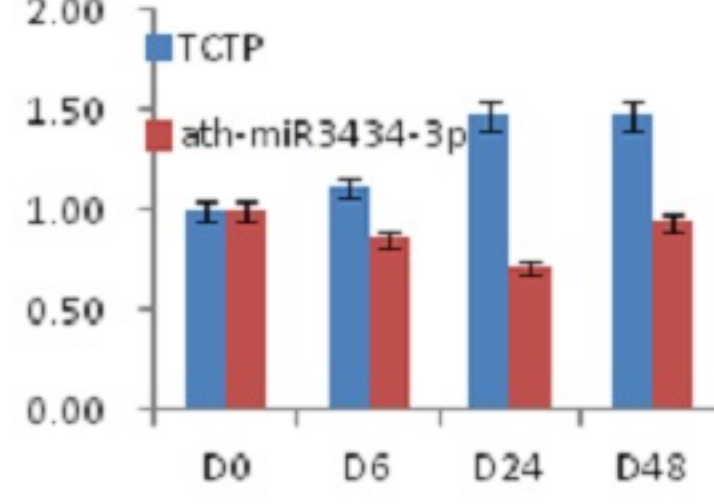

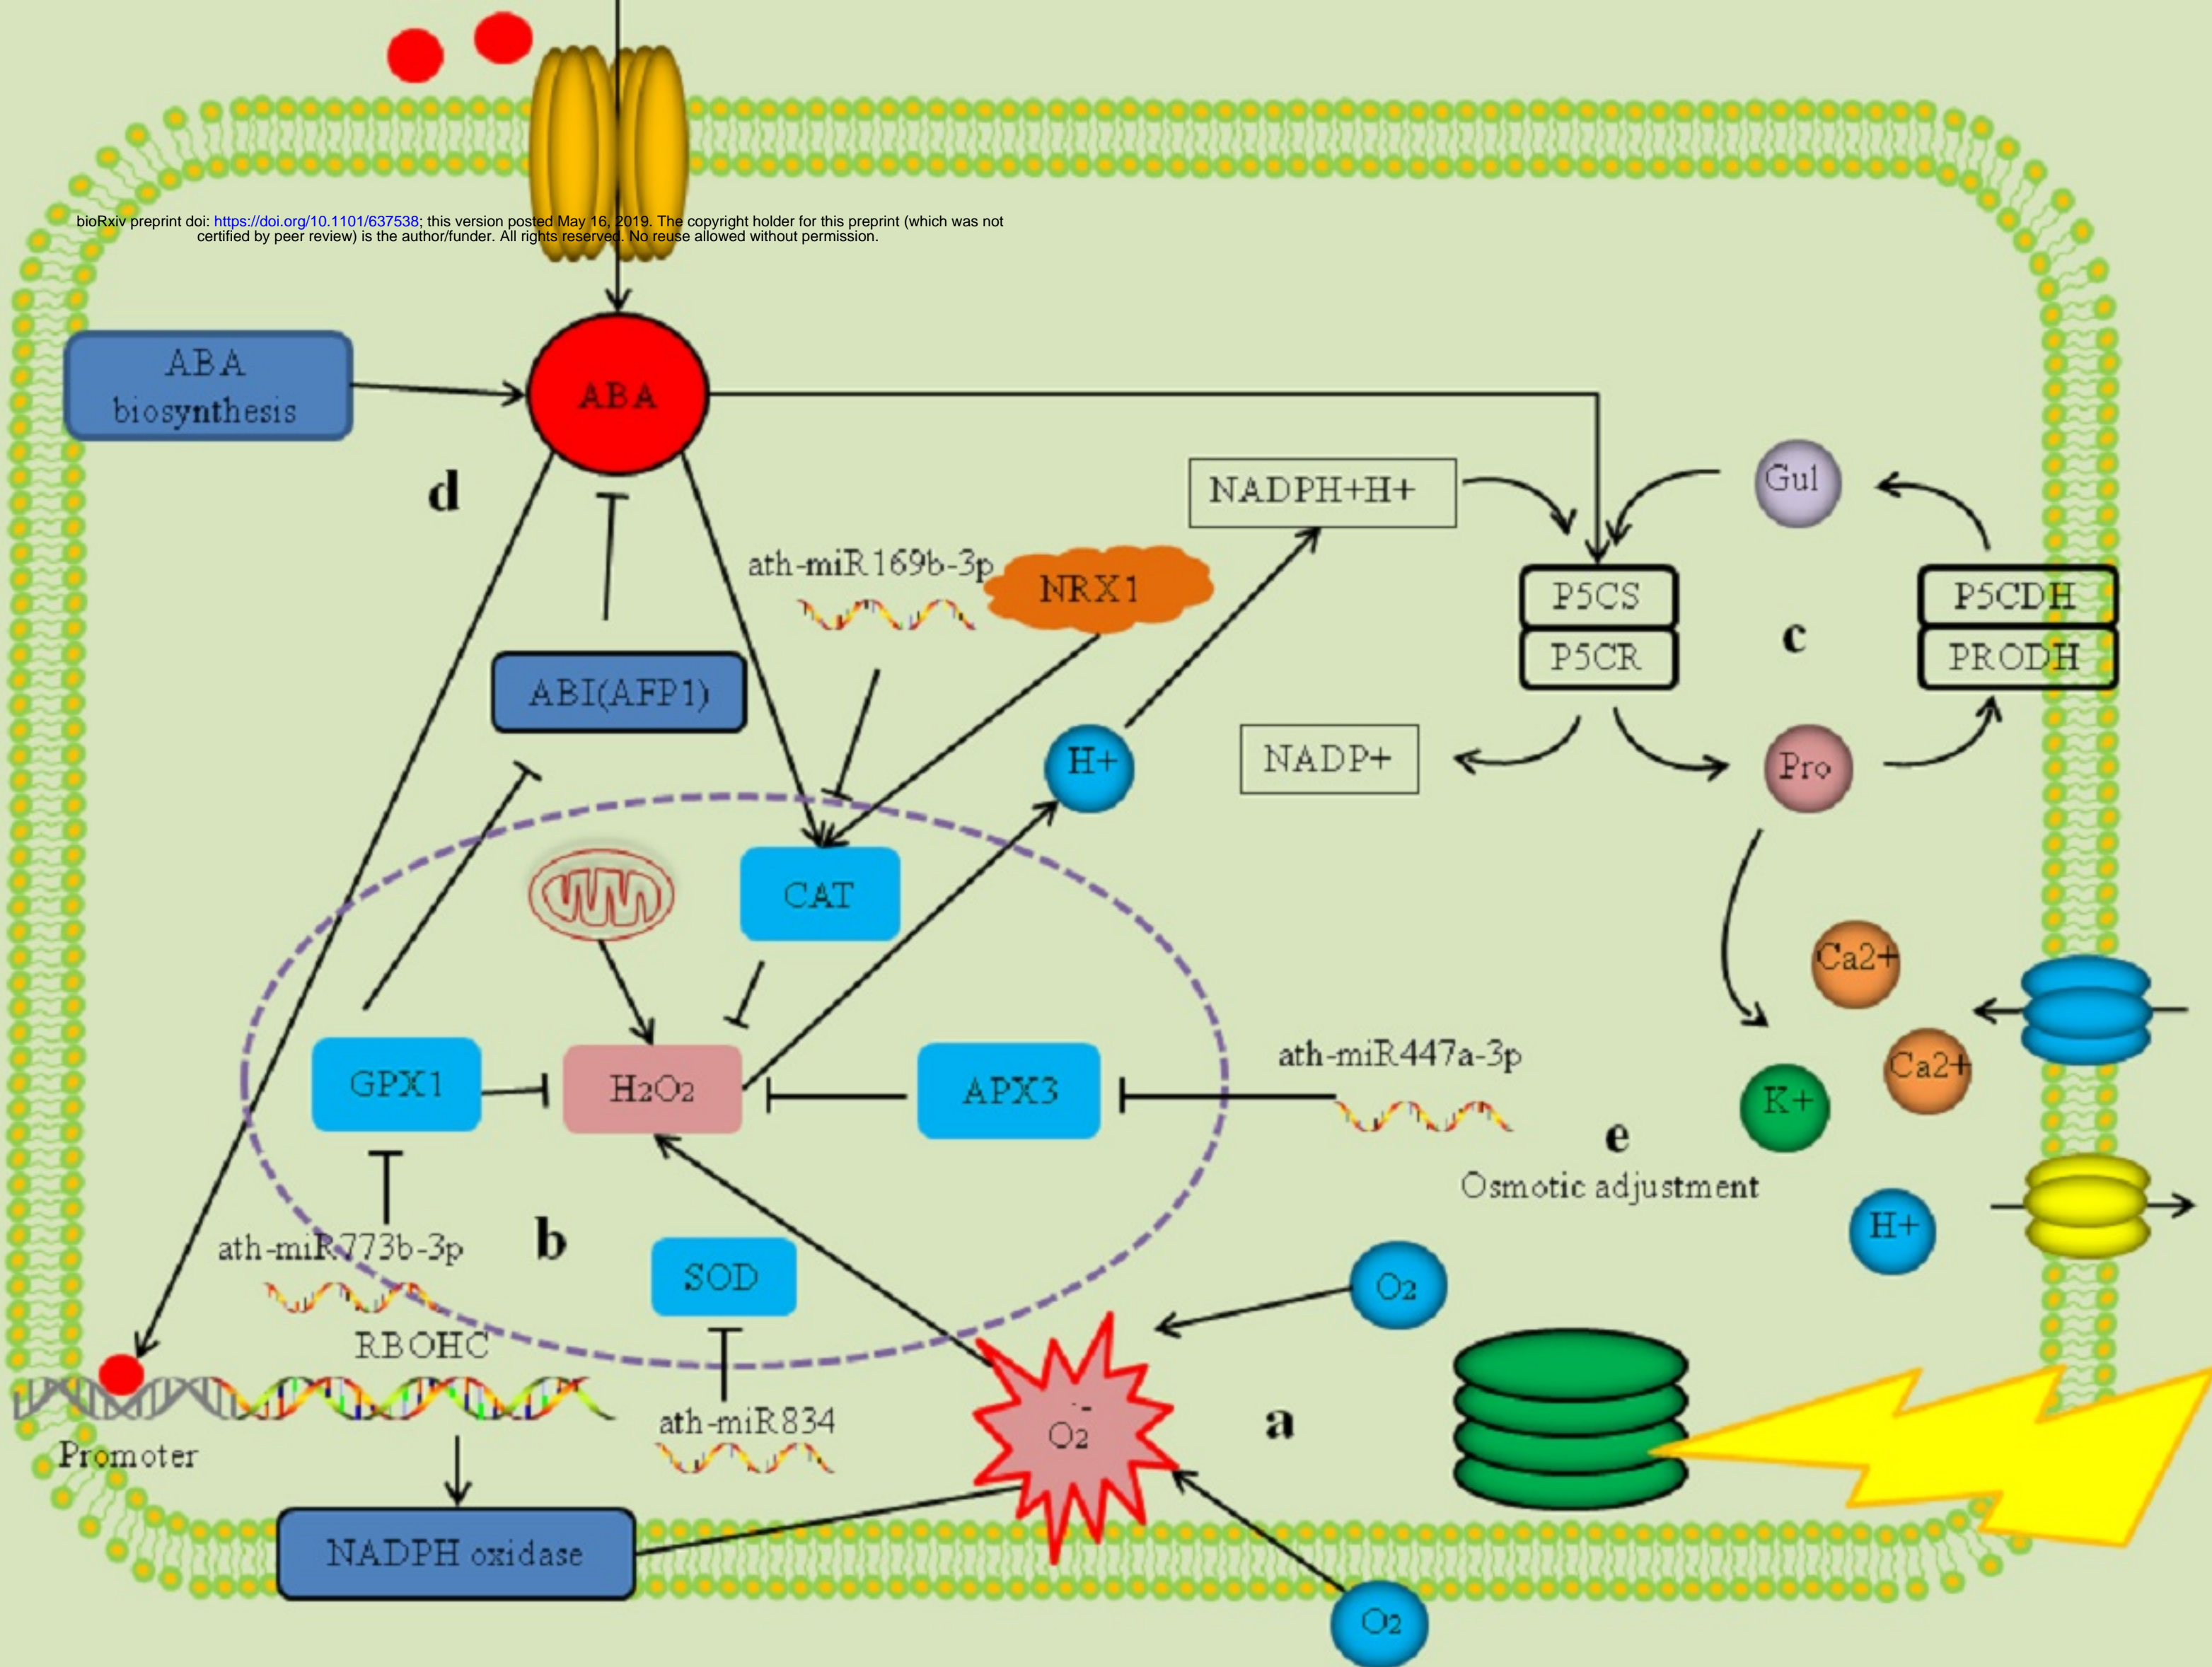

Source: https://www.biorxiv.org/content/10.1101/637538v1.full.pdf
